1 **Programmed Switch in The Mitochondrial Degradation Pathways During Human Retinal**  
2 **Ganglion Cell Differentiation from Stem Cells is Critical for RGC Survival**

3

4 **Running title:** MQC in human stem cell derived RGC survival

5 Arupratan Das<sup>a\*</sup>, Claire M. Bell<sup>b</sup>, Cynthia A. Berlinicke<sup>a</sup>, Nicholas Marsh-Armstrong<sup>c</sup> and Donald J.  
6 Zack<sup>a,d,e,f\*</sup>

7

8 <sup>a</sup>Department of Ophthalmology, Wilmer Eye Institute, Johns Hopkins University School of Medicine,  
9 Baltimore, Maryland, USA; <sup>b</sup>McKusick-Nathans Institute of Genetic Medicine, Johns Hopkins University  
10 School of Medicine, Baltimore, Maryland, USA; <sup>c</sup>Department of Ophthalmology and Vision Science,  
11 University of California, Davis, CA, USA; <sup>d</sup>Department of Molecular Biology and Genetics, Johns Hopkins  
12 University School of Medicine, Baltimore, Maryland, USA; <sup>e</sup>The Solomon H. Snyder Department of  
13 Neuroscience, Johns Hopkins University School of Medicine, Baltimore, Maryland, USA; <sup>f</sup>Institute of  
14 Genetic Medicine, Johns Hopkins University School of Medicine, Baltimore, Maryland, USA

15

16 **Author Contributions:**

17 Arupratan Das: Conception and design, financial support, collection and assembly of data, data analysis  
18 and interpretation, manuscript writing, final approval of manuscript; Claire M. Bell: collection and  
19 assembly of data; Cynthia A. Berlinicke: collection and assembly of data, manuscript writing; Nicholas  
20 Marsh-Armstrong: data analysis and interpretation, manuscript writing; Donald J. Zack: conception and  
21 design, financial support, administrative support, collection and assembly of data, data analysis and  
22 interpretation, manuscript writing, final approval of manuscript.

23 **\*Correspondence:** Donald J. Zack, M.D., Ph.D., 400 N. Broadway, Smith Building, Room 3029,

24 Baltimore, Maryland 21231, USA. Telephone: 410-502-5230; Fax: 410 502-5382; e-mail:

25 dzack@jhmi.edu.; or Arupratan Das, Ph.D., 400 N. Broadway, Smith Building, Room 3001-K, Baltimore,

26 Maryland 21231, USA. Telephone: 513-461-1573; e-mail: arupratan.das@gmail.com

27

28 **ABSTRACT**

29

30 Retinal ganglion cell (RGC) degeneration is the root cause for vision loss in glaucoma as well as in other  
31 forms of optic neuropathies. Genetic analysis indicated abnormal mitochondrial quality control (MQC) as  
32 a major risk factor for optic neuropathies. However, nothing is known on how MQC regulates human retinal  
33 ganglion cell (hRGC) health and survival. Human pluripotent stem cells (hPSCs) provide opportunity to  
34 differentiate hRGCs and understand the abnormal MQC associated hRGC degeneration in great detail.  
35 Degradation of damaged mitochondria is a very critical step of MQC, here we have used stem cell derived  
36 hRGCs to understand the damaged mitochondrial degradation pathways for hRGC survival. Using  
37 pharmacological methods, we have investigated the role of the proteasomal and endo-lysosomal pathways  
38 in degrading damaged mitochondria in hRGCs and their precursor stem cells. We find that upon  
39 mitochondrial damage with the proton uncoupler carbonyl cyanide m-chlorophenyl hydrazone (CCCP),  
40 hRGCs more efficiently degraded mitochondria than their precursor stem cells. We further identified that  
41 for degrading damaged mitochondria, stem cells predominantly use the ubiquitine-proteasome system  
42 (UPS) while hRGCs use the endo-lysosomal pathway. UPS inhibition causes apoptosis in stem cells, while  
43 hRGC viability is dependent on the endo-lysosomal pathway but not on the UPS pathway. This suggests  
44 manipulation of the endo-lysosomal pathway could be therapeutically relevant for RGC protection in  
45 treating glaucoma. Endo-lysosome dependent cell survival is also conserved for other human neurons as  
46 differentiated human cerebral cortical neurons also degenerated upon endo-lysosomal inhibition but not for  
47 the proteasome inhibition.

48

49 **SIGNIFICANCE STATEMENT:** Using human stem cells we have shown a switch in the mitochondrial  
50 degradation pathway during hRGC differentiation where endo-lysosomal pathway becomes the  
51 predominant pathway for cellular homeostasis and hRGC survival which is also true for human cortical  
52 neurons. These findings suggest manipulation of the endo-lysosomal pathway could be therapeutically

53 relevant for RGC protection in treating glaucoma as well as for other neurodegenerative diseases.

54

55 **Key Words:** Stem cells, Human retinal ganglion cells (hRGCs), Glaucoma, Neurodegeneration,  
56 Autophagy-lysosome, UPS

57

## 58 **INTRODUCTION**

59 Optic neuropathies such as glaucoma, Leber's hereditary optic neuropathy (LHON), dominant optic  
60 atrophy (DOA) [1] and several other neurodegenerative diseases are associated with abnormal  
61 mitochondrial quality control (MQC) [2,3]. In almost all of these optic neuropathies, irreversible damage  
62 of retinal ganglion cells (RGCs) leads to complete blindness [1]. MQC involves mitochondrial dynamics,  
63 biogenesis and degradation. While each step of MQC is important for mitochondrial homeostasis, defects  
64 in mitochondrial degradation are particularly severe, as they result in an accumulation of damaged  
65 mitochondria and ultimately lead to cell death through apoptosis [4–6]. Macroautophagy is a conserved  
66 catabolic process in which damaged proteins or organelles are degraded through forming a double  
67 membrane structure around them with complex protein interactions known as autophagosomes followed  
68 by fusion with the lysosomes where the damaged materials are degraded [7–9]. Selective degradation of  
69 damaged mitochondria through the lysosome-mediated autophagic pathway is called mitophagy [10,11].  
70 Apart from cell autonomous mitophagy, recent report has also shown that RGCs shed mitochondria at the  
71 mice optic nerve head (ONH) by the adjacent astrocytes, a process referred to as transmitophagy [12].

72 Investigating human RGC-specific mitochondrial degradation pathways at the cellular level has  
73 been challenging due to the unavailability of hRGCs. Although studies in rodent models using both in-vivo  
74 and purified primary RGCs have given great insights into the molecular pathways involved in RGC survival  
75 [13–18], attempts to implement this knowledge in treating human optic neuropathies have been largely  
76 unsuccessful due to the inherent differences between rodent and human RGCs [19]. Therefore, in order to  
77 successfully move forward it is essential to have human stem cell-derived RGCs which will enable us to  
78 have a comprehensive understanding of MQC and its potential role in hRGC survival. It will further enable

79 us to study the adaption of the MQC pathways during the course of RGC differentiation by comparing the  
80 process both in the stem cells and in differentiated RGCs.

81 Healthy mitochondrial homeostasis in adult human stem cells is required to prevent stem cell  
82 aging and maintaining pluripotency [20]. The endo-lysosomal and proteasomal pathways are the two major  
83 cellular quality control pathways for clearing damaged organelles and proteins. However, it is unclear how  
84 hRGCs and their origin stem cells use either pathway for maintaining mitochondrial homeostasis. Studies  
85 in mice have shown mitophagy is required for the self-renewal [21,22] and differentiation [23] of  
86 hematopoietic stem cells (HSCs) as well as for cancer stem cell maintenance [24,25] in humans. The  
87 ubiquitin proteasome system (UPS) is highly active in hPSCs and upon cellular differentiation, the  
88 proteasome remains active but at a reduced level [26,27]. It is still unclear if hPSCs use the UPS system for  
89 degrading damaged mitochondria.

90 Several studies in mice have shown programmed mitophagy is required for RGC differentiation  
91 [28,29], and an *E50K* mutation in the autophagy adaptor protein optineurin (OPTN) has been shown to  
92 cause mitochondrial accumulation and RGC death [30]. Additionally, *OPTN<sup>E50K</sup>* mutation was also found  
93 in the severe form of normal-tension glaucoma (NTG) patients [31]. It is well accepted that the  
94 mitochondrial dynamics and quality control are central to mouse RGC viability [32]; however, the role of  
95 the lysosomal-autophagy and proteasomal pathways in degrading damaged mitochondria in hRGCs and its  
96 effect on hRGC survival are not yet understood.

97 In this study, we used small molecule-based hPSC differentiation and bead-based  
98 immunopurification to obtain highly pure, well-characterized hRGCs [33]. These hRGCs were used to  
99 investigate the role of the endo-lysosomal and the proteasomal pathways in clearing damaged mitochondria  
100 in comparison to their precursor stem cells. Our study shows hRGCs predominantly use the endo-lysosomal  
101 pathway for degrading damaged mitochondria to prevent apoptosis, whereas hPSCs primarily use the  
102 proteasomal pathway for mitochondrial clearance and cell survival.

103

104 **MATERIALS AND METHODS**

105 **Reporter line Generation.** H9 (WiCell, Madison, <https://www.wicell.org>) human embryonic stem cells  
106 with the BRN3B-P2A-tdTomato-P2A-THY1.2 reporter were developed in our lab [33] and used in this  
107 study as H9-ESCs. iPSCs (EP1) were developed in our lab [34] and used here as EP1-iPSCs. EP1 with the  
108 BRN3B-P2A-tdTomato-P2A-THY1.2 reporter was made by CRISPR/Cas9-based gene editing using a  
109 gRNA plasmid with Cas9 and puromycin selection, and the donor plasmid with the reporter genes as used  
110 before [33]. In Brief, EP1-iPSCs were transfected with the DNA-In stem reagent (MTI-GlobalStem/Thermo  
111 Fisher) following fresh media change after 24 hrs. After 40 hours of transfection, cells were selected against  
112 puromycin (0.9  $\mu\text{g/ml}$ ) for 24 hrs and recovered for 4-5 days with fresh media without puromycin. To  
113 isolate positive clones, cells were re-plated at clonal density, and single colonies were genotyped by PCR  
114 as described in the previous study [33].

115

116 **Human RGC Differentiation and Immunopurification.** RGC reporter lines were plated on 1% (vol/vol)  
117 Matrigel-GFR (BD Biosciences) coated dishes and differentiated using small molecules as described in the  
118 previous study [33]. Successful RGC differentiation was monitored by tdTomato expression and purified  
119 during day 40-45 after dissociation with Accumax cell dissociation solution (Innovative Cell Technologies),  
120 as described in the previous study [33].

121

122 **hPSC and RGC Maintenance and Drug Treatments.** hPSCs and RGCs were cultured and maintained  
123 on 1% (vol/vol) Matrigel-GFR (BD Biosciences) coated dishes in mTeSR and N2B27 media [33]  
124 respectively. Stem cells and RGCs were cultured in 37<sup>o</sup>C hypoxia (10% CO<sub>2</sub>, 5% O<sub>2</sub>) and normoxia (5%  
125 CO<sub>2</sub>) incubators, respectively. The following drugs were used in this study: CCCP (Sigma, # C2759),  
126 bafilomycin A1 (Sigma, # B1793), hydroxychloroquine (Fisher Scientific, # AC263010250), bortezomib  
127 (Selleckchem, # S1013), oligomycin (Millipore, # 495455), antimycin (Sigma, #A8674), oligomycin-  
128 antimycin (OA) drug combination used at 10 $\mu\text{M}$  and 4 $\mu\text{M}$  concentrations respectively, and MG132  
129 (Millipore-Sigma, # M8699).

130

131 **Mitochondrial DNA Quantification by qPCR.** After purification, RGCs were plated on Matrigel-coated  
132 tissue culture plates and grown for three days prior to the indicated drug treatments. Cells were dissociated  
133 using Accumax for 15min and quenched with the N2B27 media followed by centrifugation at 300Xg for  
134 5min. DNA was isolated from the cell pellets using DNeasy Blood and Tissue kit (Qiagen) followed by  
135 simultaneous quantification of the mitochondrial and nuclear DNA content within the same sample using  
136 Taqman chemistry (Thermo Fisher) with StepOnePlus Real-Time PCR system (Applied Biosystems).  
137 Human mitochondrial DNA was detected via measurement of the very stable region on the mitochondrial  
138 ND1 gene [35] using following primers [36];  
139 forward: 5' CCTTCGCTGACGCCATAAA3', reverse: 5'TGGTAGATGTGGCGGGTTTT3', ND1-probe:  
140 6FAM-5'TCTTCACCAAAGAGCC3'-MGBNFQ (6FAM and the MGBNFQ are the fluorescence reporter  
141 and quencher respectively). For an internal control, nuclear DNA content was measured using the human  
142 RNase P gene (TaqMan Copy Number Reference assay Catalog # 4403326).

143 For hPSCs (H9-ESCs/EP1-iPSCs), 15,000 cells were plated on each well of a Matrigel-coated 96-  
144 well dish. After 24 hrs of recovery, cells were treated with the indicated drugs and dissociated with Accutase  
145 (Millipore-Sigma) and quenched with mTeSR media (STEMCELL Technologies) containing blebbistatin  
146 (Sigma), followed by centrifugation at 300Xg for 5min to pellet the cells. Mitochondrial content for each  
147 sample was measured as explained above.

148

149 **Mitochondrial DNA Quantification by Flow cytometry.** Flow cytometry-based measurements were done  
150 using mitochondria specific dye, mito tracker deep red (MTDR, Molecular probes) using cell sorter SH800  
151 (Sony) on analyzer mode. 10,000-20,000 cells were analyzed at the FL-4 channel (far-red) to measure  
152 MTDR intensity. For 3 hr CCCP treatments (Fig. 1G, I), cells were labelled first while for 24 hrs treatments,  
153 cells were labelled after the drug treatments with media containing 10nM MTDR for 15min at 37<sup>0</sup>C. Cells  
154 were dissociated and centrifuged as explained in the qPCR method followed by suspension in media without  
155 MTDR for flow analysis.

156

157 **Cell Viability and Apoptosis Measurements.** Cell viability and apoptosis were measured using ApoTox-  
158 Glo Triplex assay kit (Promega) following manufacturer's guideline with the CLARIOstar microplate  
159 reader (BMG LABTECH). Cell viability was measured by the ratio of fluorescence intensity between  
160 400nm (viability) and 482nm (cytotoxicity) channels, and apoptosis was measured by luminescence-based  
161 caspase-3/7 activity. hPSCs (10,000/well) and RGCs (15,000/well) were plated on each well of Matrigel-  
162 coated 96well dish in mTeSR containing blebbistatin and N2B27 media respectively. After one day (hPSCs)  
163 and three days (RGCs) of recovery, cells were treated with the indicated drugs for 24 hrs and analyzed for  
164 cell viability and apoptosis.

165

166 **Image Acquisition to Show Cell Viability.** Images were acquired after indicated treatments using EVOS  
167 FL Imaging System (ThermoFisher Scientific).

168

169 **Lysosome/acidic Vesicles Inhibition Assay.** 20,000 H9-RGCs were plated and grown on Matrigel-coated  
170 glass-bottom dish (MatTek) in N2B27 media for three days in the 37<sup>0</sup>C normoxia incubator (5% CO<sub>2</sub>).  
171 After 24 hrs of treatment with the endo-lysosomal inhibitors Baf or HCQ, media was replaced with 100µl  
172 of media containing pH sensitive pHrodo-green conjugated dextran solution (ThermoFisher Scientific) (100  
173 µg/ml) for 20min followed by a fresh media exchange after a brief wash. Confocal (Zeiss LSM 710) live  
174 images were acquired using the live cell set up with plan-apochromat 40x/oil objective with 1.4 numerical  
175 aperture. pHrodo-Green and tdTomato-expressing RGCs were detected with the 488nm and 560nm laser  
176 lines respectively.

177

178 **Human Cortical Neuron Differentiation.** Cortical neurons were differentiated from H1-ESCs as  
179 described in Xu et al [37]. Experiments were performed on 100-120 days of post-differentiated cortical  
180 neurons.

181 **Immunofluorescence and Imaging.** For measuring ubiquitination level, 20,000 purified RGCs were plated  
182 on matrigel-coated glass-bottom dishes (MatTek) for three days followed by 24 hrs of treatment with the  
183 indicated drugs. Cells were fixed with 4% paraformaldehyde in PBS for 15min at 37<sup>0</sup>C followed by 1 hr of  
184 blocking at room temperature with blocking solution (PBS with 5% donkey serum and 0.2%Triton X-100).  
185 Samples were incubated with primary antibody against ubiquitin (Rabbit-anti-ubiquitin, Cell Signaling  
186 Technology, 1:200 dilution) overnight at 4<sup>0</sup>C. Samples were washed for three times for 5min each with  
187 washing solution (PBS with 1% donkey serum and 0.05%Triton X-100) and incubated with the secondary  
188 antibody (anti-rabbit-Cy5, 1:500 dilution) in blocking solution for 1 hr at room temperature. Following  
189 secondary antibody washed three times, with DAPI added in the second wash.

190 Cultured human cortical neurons of 100-120 days post-differentiation were immunostained as  
191 above with primary antibodies against MAP2 (Mouse-anti-MAP2, Sigma, 1:200 dilution), VGLUT1  
192 (Mouse-anti-VGLUT, SYSY, 1:2500 dilution) and VGAT (Rabbit-anti-VGAT, SYSY, 1:500 dilution).  
193 Confocal images were acquired using LSM 710 (Zeiss) as done for pHrodo-Green, but without the live set-  
194 up.

195  
196 **Statistical Analysis.** Statistical comparisons between two data sets were done with the Student's *t*-test.  
197 One-way ANOVA tests (Table1) were performed for analysis containing three or more independent groups.

198

## 199 **RESULTS**

### 200 **RGCs are More Efficient in Degrading Damaged Mitochondria than Their Precursor Stem Cells.**

201 To investigate mitochondrial degradation in both human RGCs and in their stem cell origin, we  
202 used a CRISPR/Cas9 mediated genetically engineered human embryonic stem cell (hESC-H9) reporter line  
203 with a P2A-tdTomato-P2A-Thy1.2 construct introduced into the endogenous RGC-specific POU4F2  
204 (BRN3B) locus [33]. Small molecule-based differentiation followed by immunopurification of Thy1.2-  
205 expressing cells yields highly enriched RGCs (Supporting Information Fig. S1) that have been well-  
206 characterized transcriptomically and electrophysiologically [33,38]. The reporter line will be referred as



207 “H9-ESCs” and the corresponding RGCs as “H9-RGCs.” To study the effect of mitochondrial damage on  
208 RGCs and stem cells, we have used the mitochondrial uncoupler CCCP. Upon mitochondrial damage with  
209 CCCP for 3 hrs, H9-ESCs showed no reduction in their mitochondrial level (Fig. 1A), as measured by a  
210 qPCR assay that compares the level of mitochondrial gene ND1 DNA to that of nuclear gene RNase P  
211 DNA. This result was surprising because CCCP has been reported to induce mitophagy within 1 hr of  
212 exposure [39], and hence we expected to see a decrease in mitochondrial content. We hypothesized that due  
213 to this apparent lack of appropriate mitochondrial clearance in the H9-ESC cells, which would presumably  
214 lead to a buildup of CCCP-induced damaged mitochondria, hence there would be an increase of cell death.  
215 However, even with 24 hrs of treatment with CCCP there is no detectable cell death in H9-ESCs (Fig. 1B,  
216 C). Contrary to the situation with H9-ESCs, CCCP treatment for 3 hrs reduced the mitochondrial content  
217 of H9-RGCs (Fig. 1D). As with the H9-ESCs, CCCP treatment did not result in RGC cell death at 24 hrs  
218 (Fig. 1E, F; there was a small decrease in cell viability, but it was not statistically significant). These results  
219 suggest that RGCs are may be more efficient in degrading damaged mitochondria than their precursor stem  
220 cells.

221 With the unexpected result of no change in mitochondrial content with CCCP and yet no cell death  
222 for H9-ESCs, we next asked whether ESCs might be clearing up damaged mitochondria while  
223 simultaneously synthesizing more mitochondria to keep up with their metabolic needs for rapid cell  
224 division, and this simultaneous new synthesis might be masking possible mitochondrial degradation. To  
225 test this possibility, we tracked mitochondrial levels upon CCCP treatment using the mitochondria-specific  
226 dye mitotracker deep red (MTDR) followed by flow cytometry [40] (Supporting Information Fig. S2).  
227 MTDR covalently binds to the reduced thiols within the mitochondria matrix proteins and once bound,  
228 MTDR remains in the mitochondria independent of mitochondrial membrane potential [41,42]. As CCCP  
229 lowers mitochondrial membrane potential and could affect initial MTDR binding, to avoid this potential  
230 artifact, mitochondria were labelled with the MTDR dye prior to CCCP treatment, which after appropriate  
231 incubation was followed with flow cytometry-based analysis of mitochondrial content (Fig. 1G). With this  
232 experimental paradigm, mitochondria synthesized after CCCP treatment will not be labelled, and thus will

233 not be detected, and hence will not mask possible degradation of pre-existing damaged mitochondria.  
234 Interestingly, we observed reduced mitochondria levels with increasing doses of CCCP for H9-ESCs (Fig.  
235 1H) and saw similar but more dramatic reduction in mitochondria in H9-RGCs at 5 and 10  $\mu$ M CCCP (Fig.  
236 1H). To make sure this was not a cell line-specific effect, we performed a parallel experiment with an iPSC-  
237 derived POU4F2 reporter line (EP1-iPSCs), again examining both undifferentiated stem cells and  
238 differentiated RGCs (EP1-RGCs). In agreement with the H9 results, the iPSCs showed mitochondrial  
239 degradation with increasing doses of CCCP and the corresponding RGCs degraded mitochondria more  
240 efficiently compared to the undifferentiated iPSCs (Fig. 1I). Of note, EP1-iPSCs showed relatively reduced  
241 mitochondrial clearance compared to the H9-ESCs (Fig. 1H, I) and upon CCCP damage, correspondingly  
242 showed reduced cell viability and increased apoptosis (Fig. 1J, K), further supporting the hypothesis that  
243 inefficient degradation of damaged mitochondria may lead to apoptotic cell death. These results suggest  
244 that human RGCs more efficiently remove damaged mitochondria than their precursor stem cells, which  
245 may play a key role in the long-term survival of RGCs in humans. Investigating the pathways involved in  
246 degrading damaged mitochondria in hRGCs could be therapeutically important as modulation of the  
247 pathways involved could potentially be used to enhance hRGC survival.

248

#### 249 **The Endo-lysosomal Pathway is Required for hRGCs but not for hESCs to Degrade Damaged** 250 **Mitochondria.**

251 To better define possible cell type-specific mechanisms of mitochondrial quality control in hRGCs,  
252 we first tested the role of the endo-lysosomal pathway in degrading damaged mitochondria in hPSCs and  
253 hRGCs. Mitochondrial levels were measured after CCCP treatment both in the presence and absence of the  
254 endo-lysosomal inhibitors hydroxychloroquine (HCQ) [43] and Bafilomycin A1 (Baf) [44]. qPCR-based  
255 analysis showed that individual treatment with CCCP, HCQ, or Baf, as well as CCCP with Baf, did not  
256 affect mitochondrial level in H9-ESCs (Fig. 2A). Tracking MTDR labelled mitochondrial content upon  
257 CCCP treatment showed mitochondrial degradation in hPSCs (Fig. 1H, I). Our inability to detect an increase  
258 in mitochondria levels upon endo-lysosomal inhibition may suggest the existence of alternative pathway in

259 H9-ESCs for degrading damaged mitochondria. We observed significant cell death and apoptosis when  
260 cells were treated with Baf but did not observe similar cell death with HCQ treatment (Fig. 2B, C). This  
261 could be due to the requirement of endo-lysosomal activity and autophagy pathway for other cellular  
262 functions, such as non-mitochondrial protein and organelle homeostasis [45,46]. The differential effects of  
263 Baf and HCQ on H9-ESC survival could be due to the distinct modes of action of the two inhibitors [47].  
264 We next tested if inhibition of the mitochondrial electron transport chain (mETC) with oligomycin-  
265 antimycin (OA) would cause mitochondrial degradation in ESCs. Interestingly, we did not observe reduced  
266 mitochondrial levels with OA treatment; on the contrary, we observed increased mitochondrial levels when  
267 cells were treated alone or in combination with Baf (Fig. 2A). This finding is consistent with a prior report  
268 that inhibition of the mETC is associated with the inhibition of autophagy [48], which could account for the  
269 observed increase in mitochondrial content, and the increased cell death and apoptosis with OA treatment  
270 (Fig. 2B, C). Since oligomycin has been reported to increase inner mitochondria membrane potential ( $\Delta\Psi_m$ )  
271 [49,50], we further asked if increasing  $\Delta\Psi_m$  by inhibition of the mitochondrial permeability transition pore  
272 (mPTP) with cyclosporin A (CsA) [50] could also block mitochondrial degradation. In agreement with the  
273 OA result, we observed increased mitochondrial levels in H9-ESCs treated with CsA (Fig. 2D, E).  
274 Presumably because inhibition of damaged mitochondrial degradation can be toxic, CsA treatment also  
275 caused increased cell death and activation of apoptosis (Fig. 2F, G).

276 To test whether H9-RGCs degrade damaged mitochondria via endo-lysosomes, we blocked endo-  
277 lysosomal activity with Baf and HCQ. HCQ (with and without CCCP), but not Baf, increased mitochondrial  
278 content (Fig. 2H), indicating that HCQ is a more potent inhibitor of mitophagy in H9-RGCs than in hESCs.  
279 As expected, presumably due to its inhibition of mitochondrial clearance, HCQ caused hRGC death and  
280 apoptosis (Fig. 2I, J). Although we did not observe increased levels of mitochondria with Baf treatment  
281 (Fig. 2H), we did observe increased H9-RGC apoptosis and cell death (Fig. 2I, J). As an indication that they  
282 were having their expected pharmacological activities, both Baf and HCQ increased the pH of the acidic  
283 endo-lysosomal vesicles as shown by a decrease in fluorescence dots of the pH-sensitive dye pHrodo-green

284 dextran (Supporting Information Fig. S3). The explanation of the differences between the effects of Baf and  
285 HCQ is unclear, but may reflect that the two drugs differentially affect the endo-lysosomal compartments  
286 which have been reported [47].

287         The above data suggest differentiated RGCs are different from their origin stem cells in terms of  
288 using endo-lysosomes for degrading damaged mitochondria. For stem cells, inhibition of endo-lysosomes  
289 was toxic but did not increase mitochondrial content. While in H9-RGCs inhibition of endo-lysosomal  
290 pathway both inhibited mitochondrial degradation as well as reduced RGC survival, suggesting RGCs  
291 predominantly use endo-lysosomal pathway for mitophagy and cellular homeostasis. Choice for using  
292 endo-lysosomal pathway versus UPS to maintain healthy cellular homeostasis is critical for cell survival.  
293 With the apparent difference between hESCs and hRGCs in choosing endo-lysosomal pathway and the  
294 potential involvement of UPS in neurodegenerative diseases [51], led us to ask the role of UPS for  
295 mitochondrial clearance and neuro-protection in hRGCs and for the origin stem cells.

296

297 **The UPS is Required for Mitochondrial Degradation and Cell Survival for hPSCs but not for**  
298 **hRGCs.**

299         As an alternative to the endo-lysosomal pathway, the proteasomal (UPS) pathway is the other  
300 major cellular quality control pathway for the protein and organelle homeostasis [52]. We next  
301 investigated the role of UPS in mitochondrial clearance by using the drug bortezomib to inhibit the  
302 proteasome's 20S core particle [53]. Unexpectedly, we found that inhibiting proteasome in H9-ESCs  
303 increased mitochondrial levels in a dose dependent manner (Fig. 3A, B). As accumulation of damaged  
304 mitochondria could lead to cellular toxicity, we further observed cell death and activation of the apoptotic  
305 pathway in H9-ESCs with bortezomib treatment (Fig. 3C-E). To test if the observed effect was specific to  
306 the ESC line, we also inhibited proteasome function in EP1-iPS cells and also observed dose dependent  
307 cell death with concomitant activation of apoptosis (Supporting Information Fig. S4). These data suggest  
308 that proteasomal activity is critical for basal level mitochondrial clearance and survival of hPSCs. We  
309 next asked if proteasomal activity is required for the clearance of acutely damaged mitochondria in H9-

310 ESCs. To test this, we induced mitochondrial damage by CCCP both in presence and the absence of  
311 bortezomib. In agreement with our hypothesis, we observed an increase level of mitochondria when  
312 proteasomal clearance was blocked by bortezomib compared to CCCP alone (Fig. 3F), suggesting that  
313 hPSCs use predominantly the proteasomal pathway to degrade damaged mitochondria.

314 To investigate if proteasomal activity is required for mitochondrial degradation and hRGC survival,  
315 we treated H9-RGCs with different doses of bortezomib for 24 hrs followed by viability and mitochondrial  
316 level measurements. Interestingly, unlike hPSCs, inhibiting proteasomal activity did not affect the survival  
317 of H9-RGCs (Fig. 3G, H). Next, we tested whether inhibiting the UPS with bortezomib affects  
318 mitochondrial homeostasis in H9-RGCs. Contrary to the hPSCs, proteasomal inhibition did not increase  
319 the mitochondrial level in H9-RGCs (Fig. 3I, J). To test the generality of these observations, proteasomal  
320 inhibition was further tested on iPSC derived RGCs (EP1-RGCs). EP1-RGCs showed mild cell death effect  
321 with a moderate increase in apoptotic activity with bortezomib treatment (Supporting Information Fig. S5A-  
322 C), but to a considerably lesser extent than observed with EP1-iPSCs, especially with respect to cell death  
323 (Supporting Information Fig. S4). With the observed differences in proteasomal regulation between hPSCs  
324 and hRGCs, we next asked if the UPS is still active in the hRGCs. Ubiquitinated proteins and organelles  
325 are degraded through the proteasome [54,55], hence inhibiting UPS activity should increase the  
326 ubiquitinated protein level. In support of our hypothesis, we found a bortezomib dose-dependent increase  
327 in the ubiquitinated protein level in H9-RGCs (Fig. 3K, L). We further tested the bortezomib results using  
328 another very potent proteasome inhibitor, MG132 [53,56]. In agreement with the bortezomib data, MG132  
329 also did not induce cell death or apoptosis in H9-RGCs (Fig. 3M-O).

330 These results suggest a switch in the mitochondrial degradation pathways from the proteasome to  
331 the endo-lysosomal pathway during human RGC differentiation, making the lysosomal-autophagy pathway  
332 a potential therapeutic target for improving mitochondrial health and therefore hRGC survival in glaucoma  
333 and in other forms of optic neuropathy patients. While these findings could be important for improving  
334 hRGC health, we were additionally interested to see if these phenomena are specific for hRGCs or also true  
335 for other types of human neurons. To address this question, we have additionally differentiated human

336 cortical neurons and tested the effect of endo-lysosomal and proteasomal inhibition on them.

337

338 **Human Cortical Neurons are Susceptible to the Endo-lysosomal Inhibition but not to the Proteasome**  
339 **Inhibition.**

340 To study the role of proteasomal and endo-lysosomal pathways for cortical neuron survival, we  
341 differentiated cortical neurons from human stem cells (H1-ESCs) following published methods [57].  
342 Cultured human cortical neurons were tested and shown to be positive for expression of the mature neuronal  
343 marker microtubule-associated protein 2 (MAP2), inhibitory marker vesicular GABA transporter (VGAT),  
344 and excitatory marker vesicular glutamate transporter (VGLUT) (Fig. 4A). To test the effect of endo-  
345 lysosomal inhibition, cells were treated with HCQ. Similar to hRGCs, we observed significant cell death  
346 and corresponding activation of apoptosis (Fig. 4B, C), suggesting endo-lysosomal pathway is important  
347 for cellular homeostasis in cortical neurons.

348 Next, we tested the effect of proteasomal inhibition by treating cortical neurons with the proteasome  
349 inhibitor bortezomib. Interestingly, like hRGCs, proteasome inhibition did not cause cell death for human  
350 cortical neurons (Fig. 4D, E).

351 Taking together, our data suggest endo-lysosomal pathway may be the predominant pathway for  
352 degrading damaged mitochondria and maintaining cellular homeostasis for not only human RGCs but also  
353 for cortical neurons. It will be interesting to test the cellular preference in choosing among proteasomal and  
354 the endo-lysosomal pathways in other differentiated human cell types as well.

355

356 **DISCUSSION**

357 Our study identifies pathways important for maintaining healthy mitochondrial homeostasis in  
358 human RGCs, which is a step forward for developing strategies to enhance RGC viability under disease  
359 conditions. The results shown here suggest three key points: first, human RGCs are more efficient in  
360 clearing up damaged mitochondria than their precursor stem cells; second, the proteasomal pathway is  
361 essential for stem cell survival but not for RGCs; and third, during RGC maturation from stem cells, the

362 pathway for mitochondrial clearance shifts from the proteasomal to the endo-lysosomal pathway.

363 While we observed mitochondrial degradation in stem cells is dependent on UPS, a question still  
364 remains on how proteasomes degrade mitochondria? An elegant study by Chan et al (2011) suggests that  
365 this could happen by Parkin mediated activation of the UPS. Upon its translocation to mitochondria, Parkin  
366 activates the 26S proteasome, leading to the degradation of the mitochondrial outer membrane proteins. For  
367 hPSCs, a similar mechanism may lead to UPS mediated mitochondrial degradation as well. However, our  
368 data suggest UPS dependent mitochondrial degradation could depend on the mitochondrial inner membrane  
369 potential ( $\Delta\Psi_m$ ). We have seen that when ESCs were treated with OA or CsA, which are known to increase  
370  $\Delta\Psi_m$  [49,50], mitochondrial degradation was inhibited (Fig. 2A, D, E). However, when treated with the  
371 uncoupler CCCP, which abolishes  $\Delta\Psi_m$  [49], mitochondrial degradation was induced (Fig. 1H, I). This  
372 suggests  $\Delta\Psi_m$  could negatively regulate UPS mediated mitochondrial degradation. Further efforts will  
373 require to understand the mechanism of how  $\Delta\Psi_m$  can regulate UPS mediated mitochondrial degradation.  
374 Even though we observed that inhibition of endo-lysosomes did not block mitophagy in ESCs, endo-  
375 lysosome involvement could not be ruled out as a previous report had shown inhibiting lysosomes increased  
376 mitochondrial content in hematopoietic stem cells (HSCs) [59].

377 Our study indicates that the endo-lysosomal pathway is the primary route for degrading damaged  
378 mitochondria in hRGCs. This is significant as it makes the endo-lysosomal pathway a potential therapeutic  
379 target to enhance mitochondrial homeostasis to increase hRGC survival. Furthermore, genetic analyses has  
380 identified the mutation in the mitophagy adaptor protein Optineurin (Optn) in normal tension glaucoma  
381 (NTG) patients [31], which makes our finding even more therapeutically relevant. Mutations in the MQC  
382 pathway proteins Mitofusin1/2 (Mfn1/2) [60] and mitochondrial DNA mutations are also associated with  
383 other forms of optic neuropathy such as LHON and neuropathy, ataxia and retinitis pigmentosa (NARP)  
384 [61]. A cellular-level intervention to maintain healthy mitochondria and mitigate optic nerve disease  
385 progression will be aided by increased understanding of the damaged mitochondrial clearance pathways in  
386 human RGCs.

387

## 388 **CONCLUSION**

389           A switch from the proteasome to the endo-lysosomal pathway for mitochondrial degradation and  
390 cell survival during RGC differentiation is significant, as this could be a general shift for other proteins and  
391 organelle homeostasis as well. The impact of such a developmental process could be twofold: first, UPS-  
392 mediated protein degradation is an ATP-dependent process and hence requires energy [62], so avoiding the  
393 UPS for protein and organelle homeostasis could be a big energy saving strategy for highly energy-  
394 dependent RGCs [63]. Second, endo-lysosomal pathway being the primary mitochondria degradation  
395 pathway for RGCs makes this pathway a therapeutic target for RGC protection in mitochondria-based optic  
396 neuropathies. Additionally, enhancing the endo-lysosome pathway could also be a valid approach for other  
397 neurodegenerative diseases since our study indicates that differentiated human cortical neurons also use the  
398 endo-lysosomal pathway for their survival.

399

## 400 **ACKNOWLEDGMENTS**

401 We thank Drs. Jin-Chong Xu, Ted M. Dawson and Valina L. Dawson for providing differentiated human  
402 cortical neurons. We also thank Drs. Sayantan Datta and James Tahara Handa for helping us to develop  
403 qPCR based mitochondrial measurements. This work was supported by grants from the NIH (P30  
404 EY001765, K99 EY028223, and R01 EY026471), Research to Prevent Blindness and generous gifts from  
405 the Guerrieri Family Foundation.

406

## 407 **DISCLOSURE OF POTENTIAL CONFLICTS OF INTRESET**

408 The authors declare no potential conflicts of interest.

409

## 410 **DATA AVAILABILITY STATEMENT**

411 The data used in the current study are available from the corresponding authors upon reasonable request.

412



413 **REFERENCES**

- 414
- 415 1 Carelli V, Morgia C La, Ross-Cisneros FN, et al. Optic neuropathies: The tip of the  
416 neurodegeneration iceberg. *Hum Mol Genet* 2017;26:R139–R150.
- 417 2 De Castro IP, Martins LM, Tufi R. Mitochondrial quality control and neurological disease: An  
418 emerging connection. *Expert Rev Mol Med* 2010;12.
- 419 3 Arun S, Liu L, Donmez G. Mitochondrial Biology and Neurological Diseases. *Curr*  
420 *Neuropharmacol* 2016;14:143–154.
- 421 4 Tait SWG, Green DR. Mitochondrial Regulation of Cell Death. *Cold Spring Harb Perspect Biol*  
422 2013;5:a008706–a008706.
- 423 5 Fraser JA, Biousse V, Newman NJ. The neuro-ophthalmology of mitochondrial disease. *Surv*  
424 *Ophthalmol* 2010;55:299–334.
- 425 6 Tait SWG, Green DR. Mitochondria and cell death: outer membrane permeabilization and beyond.  
426 *Nat Rev Mol Cell Biol* 2010;11:621–632.
- 427 7 Takeshige K, Baba M, Tsuboi S, et al. Autophagy in yeast demonstrated with proteinase-deficient  
428 mutants and conditions for its induction. *J Cell Biol* 1992;119:301–312.
- 429 8 Mizushima N, Komatsu M. Autophagy: Renovation of cells and tissues. *Cell* 2011;147:728–741.
- 430 9 Behrends C, Sowa ME, Gygi SP, et al. Network organization of the human autophagy system.  
431 *Nature* 2010;466:68–76.
- 432 10 Kiššová I, Deffieu M, Manon S, et al. Uth1p is involved in the autophagic degradation of  
433 mitochondria. *J Biol Chem* 2004;279:39068–39074.
- 434 11 Lemasters JJ. Selective Mitochondrial Autophagy, or Mitophagy, as a Targeted Defense Against  
435 Oxidative Stress, Mitochondrial Dysfunction, and Aging. *Rejuvenation Res* 2005;8:3–5.
- 436 12 Davis CO, Kim K-Y, Bushong EA, et al. Transcellular degradation of axonal mitochondria. *Proc*  
437 *Natl Acad Sci* 2014;111:9633–9638.
- 438 13 Welsbie DS, Mitchell KL, Jaskula-Ranga V, et al. Enhanced Functional Genomic Screening  
439 Identifies Novel Mediators of Dual Leucine Zipper Kinase-Dependent Injury Signaling in  
440 Neurons. *Neuron* 2017;94:1142–1154.e6.
- 441 14 Welsbie DS, Yang Z, Ge Y, et al. Functional genomic screening identifies dual leucine zipper  
442 kinase as a key mediator of retinal ganglion cell death. *Proc Natl Acad Sci U S A* 2013;110:4045–  
443 4050.
- 444 15 Mazzoni F, Novelli E, Strettoi E. Retinal Ganglion Cells Survive and Maintain Normal Dendritic  
445 Morphology in a Mouse Model of Inherited Photoreceptor Degeneration. *J Neurosci*  
446 2008;28:14282–14292.
- 447 16 Levkovitch-Verbin H, Harris-Cerruti C, Groner Y, et al. RGC death in mice after optic nerve crush  
448 injury: Oxidative stress and neuroprotection. *Investig Ophthalmol Vis Sci* 2000;41:4169–4174.
- 449 17 Goldblum D, Mittag T. Prospects for relevant glaucoma models with retinal ganglion cell damage  
450 in the rodent eye. *Vision Res* 2002;42:471–478.
- 451 18 Kim KY, Perkins GA, Shim MS, et al. DRP1 inhibition rescues retinal ganglion cells and their  
452 axons by preserving mitochondrial integrity in a mouse model of glaucoma. *Cell Death Dis*  
453 2015;6.
- 454 19 Perrin S. Make mouse studies work. *Nature* 2014;507:423.
- 455 20 Katajisto P, Döhla J, Chaffer CL, et al. Asymmetric apportioning of aged mitochondria between  
456 daughter cells is required for stemness. *Science* (80- ) 2015;348:340–343.
- 457 21 Warr MR, Binnewies M, Flach J, et al. FOXO3A directs a protective autophagy program in  
458 haematopoietic stem cells. *Nature* 2013;494:323–327.
- 459 22 Mortensen M, Soilleux EJ, Djordjevic G, et al. The autophagy protein Atg7 is essential for  
460 hematopoietic stem cell maintenance. *J Exp Med* 2011;208:455–467.
- 461 23 Zhang J, Wu K, Xiao X, et al. Autophagy as a regulatory component of erythropoiesis. *Int J Mol*  
462 *Sci* 2015;16:4083–4094.
- 463 24 Liu K, Lee J, Kim JY, et al. Mitophagy Controls the Activities of Tumor Suppressor p53 to

- 464 Regulate Hepatic Cancer Stem Cells. *Mol Cell* 2017;68:281–292.e5.
- 465 25 Yan C, Luo L, Guo CY, et al. Doxorubicin-induced mitophagy contributes to drug resistance in  
466 cancer stem cells from HCT8 human colorectal cancer cells. *Cancer Lett* 2017;388:34–42.
- 467 26 Saez I, Koyuncu S, Gutierrez-Garcia R, et al. Insights into the ubiquitin-proteasome system of  
468 human embryonic stem cells. *Sci Rep* 2018;8.
- 469 27 Vilchez D, Boyer L, Morante I, et al. Increased proteasome activity in human embryonic stem  
470 cells is regulated by PSMD11. *Nature* 2012;489:304–308.
- 471 28 Esteban-Martínez L, Sierra-Filardi E, McGreal RS, et al. Programmed mitophagy is essential for  
472 the glycolytic switch during cell differentiation. *EMBO J* 2017;36:1688–1706.
- 473 29 Esteban-Martínez L, Boya P. BNIP3L/NIX-dependent mitophagy regulates cell differentiation via  
474 metabolic reprogramming. *Autophagy* 2017:1–3.
- 475 30 Shim MS, Takihara Y, Kim KY, et al. Mitochondrial pathogenic mechanism and degradation in  
476 optineurin E50K mutation-mediated retinal ganglion cell degeneration. *Sci Rep* 2016;6.
- 477 31 Rezaie T, Child A, Hitchings R, et al. Adult-onset primary open-angle glaucoma caused by  
478 mutations in optineurin. *Science* 2002;295:1077–1079.
- 479 32 Ito YA, Di Polo A. Mitochondrial dynamics, transport, and quality control: A bottleneck for  
480 retinal ganglion cell viability in optic neuropathies. *Mitochondrion* 2017;36:186–192.
- 481 33 Sluch VM, Chamling X, Liu MM, et al. Enhanced Stem Cell Differentiation and  
482 Immunopurification of Genome Engineered Human Retinal Ganglion Cells. *Stem Cells Transl  
483 Med* 2017;6:1972–1986.
- 484 34 Bhise NS, Wahlin KJ, Zack DJ, et al. Evaluating the potential of poly(beta-amino ester)  
485 nanoparticles for reprogramming human fibroblasts to become induced pluripotent stem cells. *Int J  
486 Nanomedicine* 2013;8:4641–4658.
- 487 35 Abnet CC, Huppi K, Carrera A, et al. Control region mutations and the “common deletion” are  
488 frequent in the mitochondrial DNA of patients with esophageal squamous cell carcinoma. *BMC  
489 Cancer* 2004;4:30.
- 490 36 Datta S, Chattopadhyay E, Ray JG, et al. D-loop somatic mutations and ~5 kb “common” deletion  
491 in mitochondrial DNA: important molecular markers to distinguish oral precancer and cancer.  
492 *Tumor Biol* 2015;36:3025–3033.
- 493 37 Xu JC, Fan J, Wang X, et al. Cultured networks of excitatory projection neurons and inhibitory  
494 interneurons for studying human cortical neurotoxicity. *Sci Transl Med* 2016.
- 495 38 Sluch VM, Davis CO, Ranganathan V, et al. Differentiation of human ESCs to retinal ganglion  
496 cells using a CRISPR engineered reporter cell line. *Sci Rep* 2015;5:16595.
- 497 39 Narendra D, Tanaka A, Suen DF, et al. Parkin is recruited selectively to impaired mitochondria  
498 and promotes their autophagy. *J Cell Biol* 2008;183:795–803.
- 499 40 Mauro-Lizcano M, Esteban-Martínez L, Seco E, et al. New method to assess mitophagy flux by  
500 flow cytometry. *Autophagy* 2015;11:833–843.
- 501 41 Keij JF, Bell-Prince C, Steinkamp JA. Staining of mitochondrial membranes with 10-nonyl  
502 acridine orange MitoFluor Green, and MitoTracker Green is affected by mitochondrial membrane  
503 potential altering drugs. *Cytometry* 2000;39:203–210.
- 504 42 Poot M, Zhang YZ, Krämer JA, et al. Analysis of mitochondrial morphology and function with  
505 novel fixable fluorescent stains. *J Histochem Cytochem* 1996;44:1363–1372.
- 506 43 Ohkuma S, Poole B. Fluorescence probe measurement of the intralysosomal pH in living cells and  
507 the perturbation of pH by various agents. *Proc Natl Acad Sci* 1978;75:3327–3331.
- 508 44 Yoshimori T, Yamamoto A, Moriyama Y, et al. Bafilomycin A1, a specific inhibitor of vacuolar-  
509 type H<sup>+</sup>-ATPase, inhibits acidification and protein degradation in lysosomes of cultured cells. *J  
510 Biol Chem* 1991;266:17707–17712.
- 511 45 Vessoni AT, Muotri AR, Okamoto OK. Autophagy in Stem Cell Maintenance and Differentiation.  
512 *Stem Cells Dev* 2012;21:513–520.
- 513 46 Subramani S, Malhotra V. Non-autophagic roles of autophagy-related proteins. *EMBO Rep*  
514 2013;14:143–151.

- 515 47 Mauthe M, Orhon I, Rocchi C, et al. Chloroquine inhibits autophagic flux by decreasing  
516 autophagosome-lysosome fusion. *Autophagy* 2018;14:1435–1455.
- 517 48 Ma X, Jin M, Cai Y, et al. Mitochondrial electron transport chain complex III is required for  
518 antimycin A to inhibit autophagy. *Chem Biol* 2011;18:1474–1481.
- 519 49 Perry SW, Norman JP, Barbieri J, et al. Mitochondrial membrane potential probes and the proton  
520 gradient: A practical usage guide. *Biotechniques* 2011;50:98–115.
- 521 50 Brustovetsky N, Dubinsky JM. Limitations of Cyclosporin A Inhibition of the Permeability  
522 Transition in CNS Mitochondria. *J Neurosci* 2000.
- 523 51 Dantuma NP, Bott LC. The ubiquitin-proteasome system in neurodegenerative diseases:  
524 precipitating factor, yet part of the solution. *Front Mol Neurosci* 2014;7.
- 525 52 Dikic I. Proteasomal and Autophagic Degradation Systems. *Annu Rev Biochem* 2017;86:193–224.
- 526 53 Goldberg AL. Development of proteasome inhibitors as research tools and cancer drugs. *J Cell*  
527 *Biol* 2012;199:583–588.
- 528 54 Hershko A, Ciechanover A. the Ubiquitin System. *Annu Rev Biochem* 1998;67:425–479.
- 529 55 Kleiger G, Mayor T. Perilous journey: A tour of the ubiquitin-proteasome system. *Trends Cell*  
530 *Biol* 2014;24:352–359.
- 531 56 Rock KL, Gramm C, Rothstein L, et al. Inhibitors of the proteasome block the degradation of most  
532 cell proteins and the generation of peptides presented on MHC class I molecules. *Cell*  
533 1994;78:761–771.
- 534 57 Xu JC, Fan J, Wang X, et al. Cultured networks of excitatory projection neurons and inhibitory  
535 interneurons for studying human cortical neurotoxicity. *Sci Transl Med* 2016;8.
- 536 58 Chan NC, Salazar AM, Pham AH, et al. Broad activation of the ubiquitin-proteasome system by  
537 Parkin is critical for mitophagy. *Hum Mol Genet* 2011;20:1726–1737.
- 538 59 de Almeida MJ, Luchsinger LL, Corrigan DJ, et al. Dye-Independent Methods Reveal Elevated  
539 Mitochondrial Mass in Hematopoietic Stem Cells. *Cell Stem Cell* 2017;21:725–729.e4.
- 540 60 Wolf C, Gramer E, Muller-Myhsok B, et al. Evaluation of nine candidate genes in patients with  
541 normal tension glaucoma: a case control study. *BMC Med Genet* 2009;10:91.
- 542 61 Yu-Wai-Man P, Griffiths PG, Chinnery PF. Mitochondrial optic neuropathies - Disease  
543 mechanisms and therapeutic strategies. *Prog Retin Eye Res* 2011;30:81–114.
- 544 62 Gottesman S, Maurizi MR. Regulation by proteolysis: energy-dependent proteases and their  
545 targets. *Microbiol Rev* 1992;56:592–621.
- 546 63 Osborne NN. Pathogenesis of ganglion “cell death” in glaucoma and neuroprotection: focus on  
547 ganglion cell axonal mitochondria. *Prog Brain Res* 2008;173:339–352.
- 548  
549

550 **Figure legends:**

551 **Figure 1. Mitochondrial degradation in stem cells and hRGCs upon CCCP treatment. (A, D)**

552 Mitochondrial content analyzed by qPCR for the mitochondrial gene ND1 and normalized with-respect-to

553 (w.r.t) the nuclear gene RNase P. Shown are  $\Delta\Delta\text{ct}$  fold change relative to the DMSO control after 3 hrs of

554 treatment with the indicated CCCP doses for both h9-ESCs (A) and H9-RGCs (D). (B, E) Cell viability

555 measurements of H9-ESCs (B) and H9-RGCs (E) after 24 hrs of treatment with the indicated doses of

556 CCCP. Cell viability was measured using the fluorescence based ApoTox-Glo triplex assay kit and

557 normalized w.r.t DMSO control. (C, F) Brightfield images shown are H9-ESCs after 24 hrs of treatment

558 with CCCP (**C**), fluorescence images shown are in the red channel for tdTomato expressing H9-RGCs after  
559 24 hrs of CCCP treatments (**F**). (**G-I**) Mitochondrial level analyzed by the flow cytometry using the  
560 mitochondria specific dye MTDR followed by CCCP treatments for 3 hrs. Chart shows the experimental  
561 design (**G**), graphs show loss of mitochondria labelled MTDR intensity normalized w.r.t DMSO control at  
562 different CCCP doses for H9-ESCs (**H**) and EP1-iPSCs (**I**) compared to the corresponding RGCs. (**J, K**)  
563 Cell viability (**J**) and apoptosis by luminescence-based caspase-3/7 activity (**K**) were measured for EP1-  
564 iPSCs using ApoTox-Glo triplex assay kit and normalized w.r.t DMSO control after 24 hrs of treatment  
565 with the indicated drugs. Scale bars, 1000  $\mu\text{m}$  (**C**) and 200  $\mu\text{m}$  (**F**). Error bars are SEM. \*\*, p-value < 0.005  
566

567 **Figure 2. hRGCs but not hESCs predominantly use endo-lysosomal pathway for degrading**  
568 **mitochondria.** (**A, D, H**) qPCR-based analysis of the mitochondrial content for H9-ESCs (**A, D**) and H9-  
569 RGCs (**H**) after 24 hrs of treatment with the indicated drugs, quantification and the analysis are done as in  
570 (Figure. 1). (**B, F, I**) Shown are cell viability measurements after 24 hrs of treatment with the indicated  
571 drugs for H9-ESCs (**B, F**) and H9-RGCs (**I**) are done as in (Figure. 1). (**C, G, J**) Quantifications represent  
572 cellular apoptosis, measured by luminescence-based caspase-3/7 activity for H9-ESCs (**C, G**) and H9-  
573 RGCs (**J**). (**E**) Flow cytometry-based analysis of the MTDR labelled mitochondria for H9-ESCs after 24  
574 hrs of treatment with the indicated drug, quantification shows normalized average intensity in the MTDR  
575 channel w.r.t DMSO. Error bars are SEM. \*\*, p-value < 0.01; \*, p-value < 0.05.

576  
577 **Figure. 3 hESCs but not hRGCs predominantly use proteasomal pathway for degrading**  
578 **mitochondria.** (**A, I**) Flow cytometry-based analysis of the MTDR labelled mitochondria in H9-ESCs (**A**)  
579 and H9-RGCs (**I**) after 24 hrs of treatment with the indicated doses of bortezomib. (**B, F, J**) qPCR analysis  
580 of the mitochondrial content in H9-ESCs (**B, F**) and H9-RGCs (**J**) after 24 hrs of treatment with the  
581 indicated drugs, quantification and the analysis are done as in (Figure. 1). (**C**) Brightfield images showing  
582 cell death in the H9-ESCs after 24 hrs of treatment with the indicated bortezomib (Bort) dose. (**D, H, N**)

583 Shown are cell viability measurements after 24 hrs of treatment with the indicate drugs for H9-ESCs (**D**)  
584 and H9-RGCs (**H, N**) as done in (Figure 1). (**E, O**) Quantifications represent cellular apoptosis, measured  
585 by luminescence-based caspase-3/7 activity for H9-ESCs (**E**) and H9-RGCs (**O**). (**G, M**) Fluorescence  
586 images shown are in the red channel for the tdTomato expressing H9-RGCs after 24 hrs of bortezomib  
587 (Bort) (**G**) and MG132 (**M**) treatments with the indicated doses. (**K, L**) Images shown are the sum  
588 projections of the confocal z-stacks on immunofluorescence against ubiquitin in H9-RGCs after 24 hrs of  
589 treatment with the indicated bortezomib doses (**K**), and quantification shows the integrated fluorescence  
590 intensity from the sum-projections of individual cell (**L**). Scale bars, 400  $\mu\text{m}$  (**C, M**), 200  $\mu\text{m}$  (**G**) and 10  
591  $\mu\text{m}$  (**K**). Error bars are SEM. \*\*, p-value < 0.01; \*, p-value < 0.05.

592

593 **Figure. 4 Effect of UPS and endo-lysosomal pathway inhibition on human cortical neuron survival.**

594 (**A**) Shown are the confocal images of immunofluorescence against neuronal marker MAP2, excitatory  
595 marker VGLUT and the inhibitory marker VGAT. (**B-E**) After 24 hrs of treatment with the indicated drugs,  
596 cell viability (**B, D**) and apoptosis (**C, E**) were measured using ApoTox-Glo triplex assay kit. Scale bars  
597 are 20  $\mu\text{m}$ . Error bars are SEM. \*\*, p-value < 0.01; \*, p-value < 0.05.

598

599 **Supplementary Fig. S1 hRGC differentiation from the H9-ESCs.** (**A**) Images shown are the  
600 representatives of different time points for RGC differentiation, tdTomato positive cells at day 20, 26 and  
601 43 indicates successful RGC differentiation. (**B**) Images shown are the H9-RGCs immunopurified against  
602 the surface antigen Thy1.2 and grown on matrigel coated tissue culture dish, high overlap between the  
603 brightfield and the tdTomato channel indicates highly pure RGC culture. Scale bars, 400  $\mu\text{m}$ .

604

605 **Supplementary Fig. S2 Flow cytometry-based analysis of the mitochondrial content.** (**A**) Forward-  
606 backward scatter plot of the H9-ESCs labelled with the dead cell dye propidium iodide (PI). (**B**) Diagonally  
607 distributed green dots in 'A' are low in PI intensity representing live cells and red dots along the BSC axis

608 in 'A' are high in PI intensity representing dead cells. This allowed empirically to select diagonally  
609 distributed live cell population for analysis. (C) Diagonally distributed live H9-ESCs were gated (red oval)  
610 for analysis. (D) Live H9-ESCs labelled with mitochondria dye MTDR (far-red) as shown in P-Q4 quadrant  
611 were analyzed for average MTDR intensity. (E) Diagonally distributed live H9-RGCs were gated (red oval)  
612 for analysis. (F) Live H9-RGCs positive for both tdTomato (red) and MTDR (far-red) distributed in the P-  
613 Q2 quadrant were analyzed for average MTDR intensity.

614

615 **Supplementary Fig. S3 Bafilomycin A1 (Baf) and hydroxychloroquine (HCQ) increased pH in RGCs.**

616 Confocal images shown are live H9-RGCs after 24 hrs of treatment with the indicated drugs followed by  
617 20min incubation with the pH sensitive pHrodo-green conjugated dextran. Scale bar, 10  $\mu\text{m}$ .

618

619 **Supplementary Fig. S4 Proteasomal activity is required for the iPSC survival. (A, B) Cell viability (A)**

620 and caspase-3/7 activity for apoptosis (B) in EP1-iPSCs were measured using ApoTox-Glo triplex assay  
621 after 24 hrs of treatment with the bortezomib at the indicated doses. Error bars are SEM. \*\*, p-value <  
622 0.005.

623

624 **Supplementary Fig. S5 Effect of proteasomal inhibition on iPSC derived RGCs. (A) Images shown are**

625 the tdTomato expressing EP1-RGCs after 24 hrs of treatment with the bortezomib at the indicated doses.

626 (B, C) Cell viability (B) and caspase-3/7 activity for apoptosis (C) were measured using ApoTox-Glo

627 triplex assay after 24 hrs of treatment with bortezomib at the indicated doses. Scale bars, 400  $\mu\text{m}$ . Error

628 bars are SEM. \*\*, p-value < 0.01; \*, p-value < 0.05

**Table 1**

One-way ANOVA test for group of data containing three or more data sets

| <b>Fig</b> | <b><i>p</i> value</b> |
|------------|-----------------------|
| Fig. 1A    | 1.3226E-05            |
| Fig. 1B    | 0.36823588            |
| Fig. 1D    | 0.00696819            |
| Fig. 1E    | 0.27528422            |
| Fig. 1J    | 6.288E-07             |
| Fig. 1K    | 1.6562E-05            |
| Fig. 2A    | 0.00333067            |
| Fig. 2B    | 1.6741E-08            |
| Fig. 2C    | 2.4542E-06            |
| Fig. 2H    | 0.00193593            |
| Fig. 2I    | 1.6819E-07            |
| Fig. 2J    | 6.8186E-05            |
| Fig. 3A    | 0.00080816            |
| Fig. 3B    | 0.03867105            |
| Fig. 3D    | 2.2998E-05            |
| Fig. 3E    | 3.6587E-05            |
| Fig. 3F    | 0.29285313            |
| Fig. 3H    | 0.24560869            |
| Fig. 3I    | 5.9384E-08            |
| Fig. 3L    | 9.6407E-05            |
| Fig. 3N    | 0.00954914            |
| Fig. 3O    | 0.0737521             |
| Fig. 4B    | 0.2133412             |
| Fig. 4C    | 0.06621655            |
| Fig. 4D    | 0.36246771            |
| Fig. 4E    | 5.8274E-05            |
| Fig. S4A   | 3.0732E-16            |
| Fig. S4B   | 3.4096E-05            |
| Fig. S5B   | 0.00080702            |
| Fig. S5C   | 0.00164726            |

# Arupratan Das, Figure. 1, Top

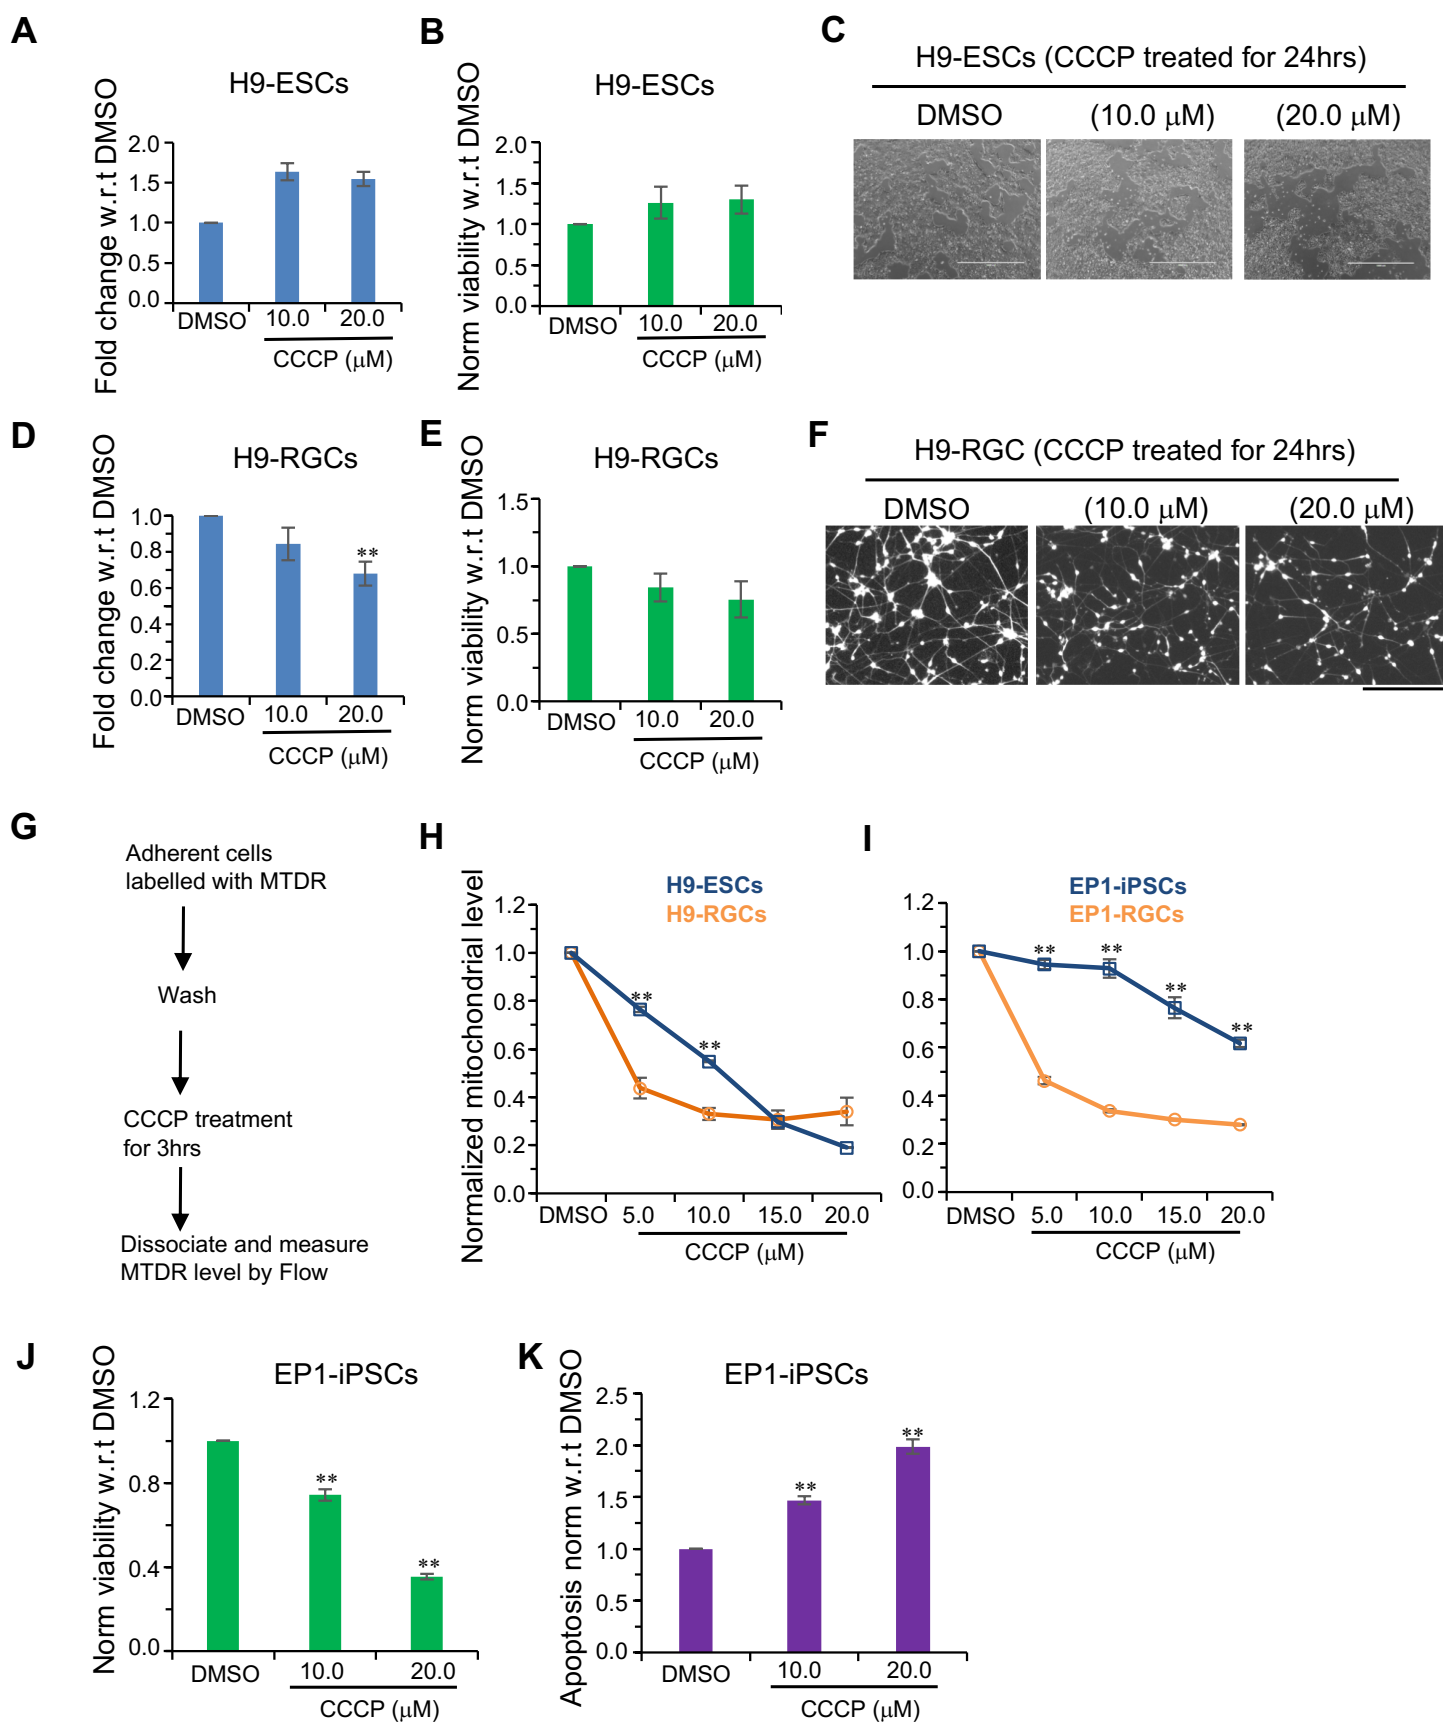



# Arupratan Das, Figure. 2, Top

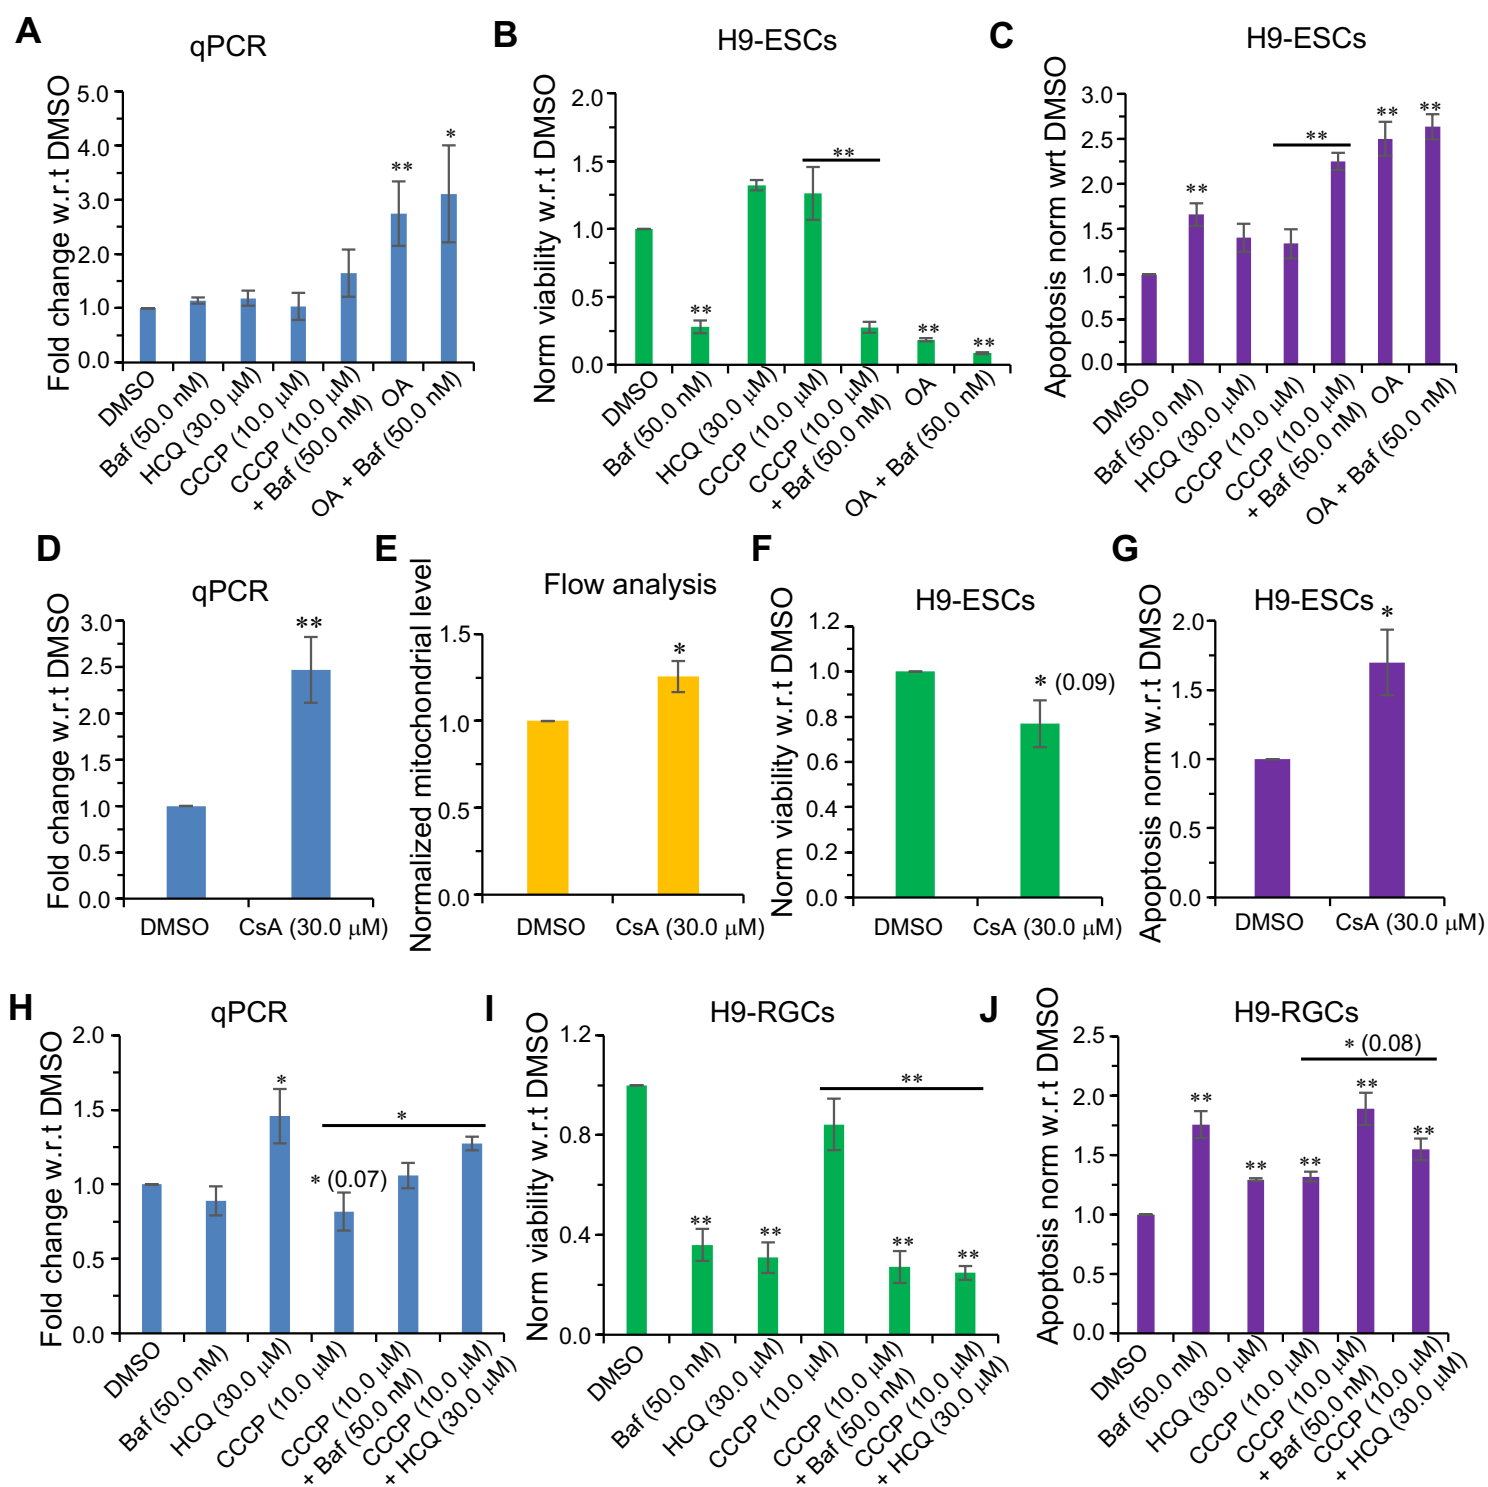

# Arupratan Das, Figure. 3, Top

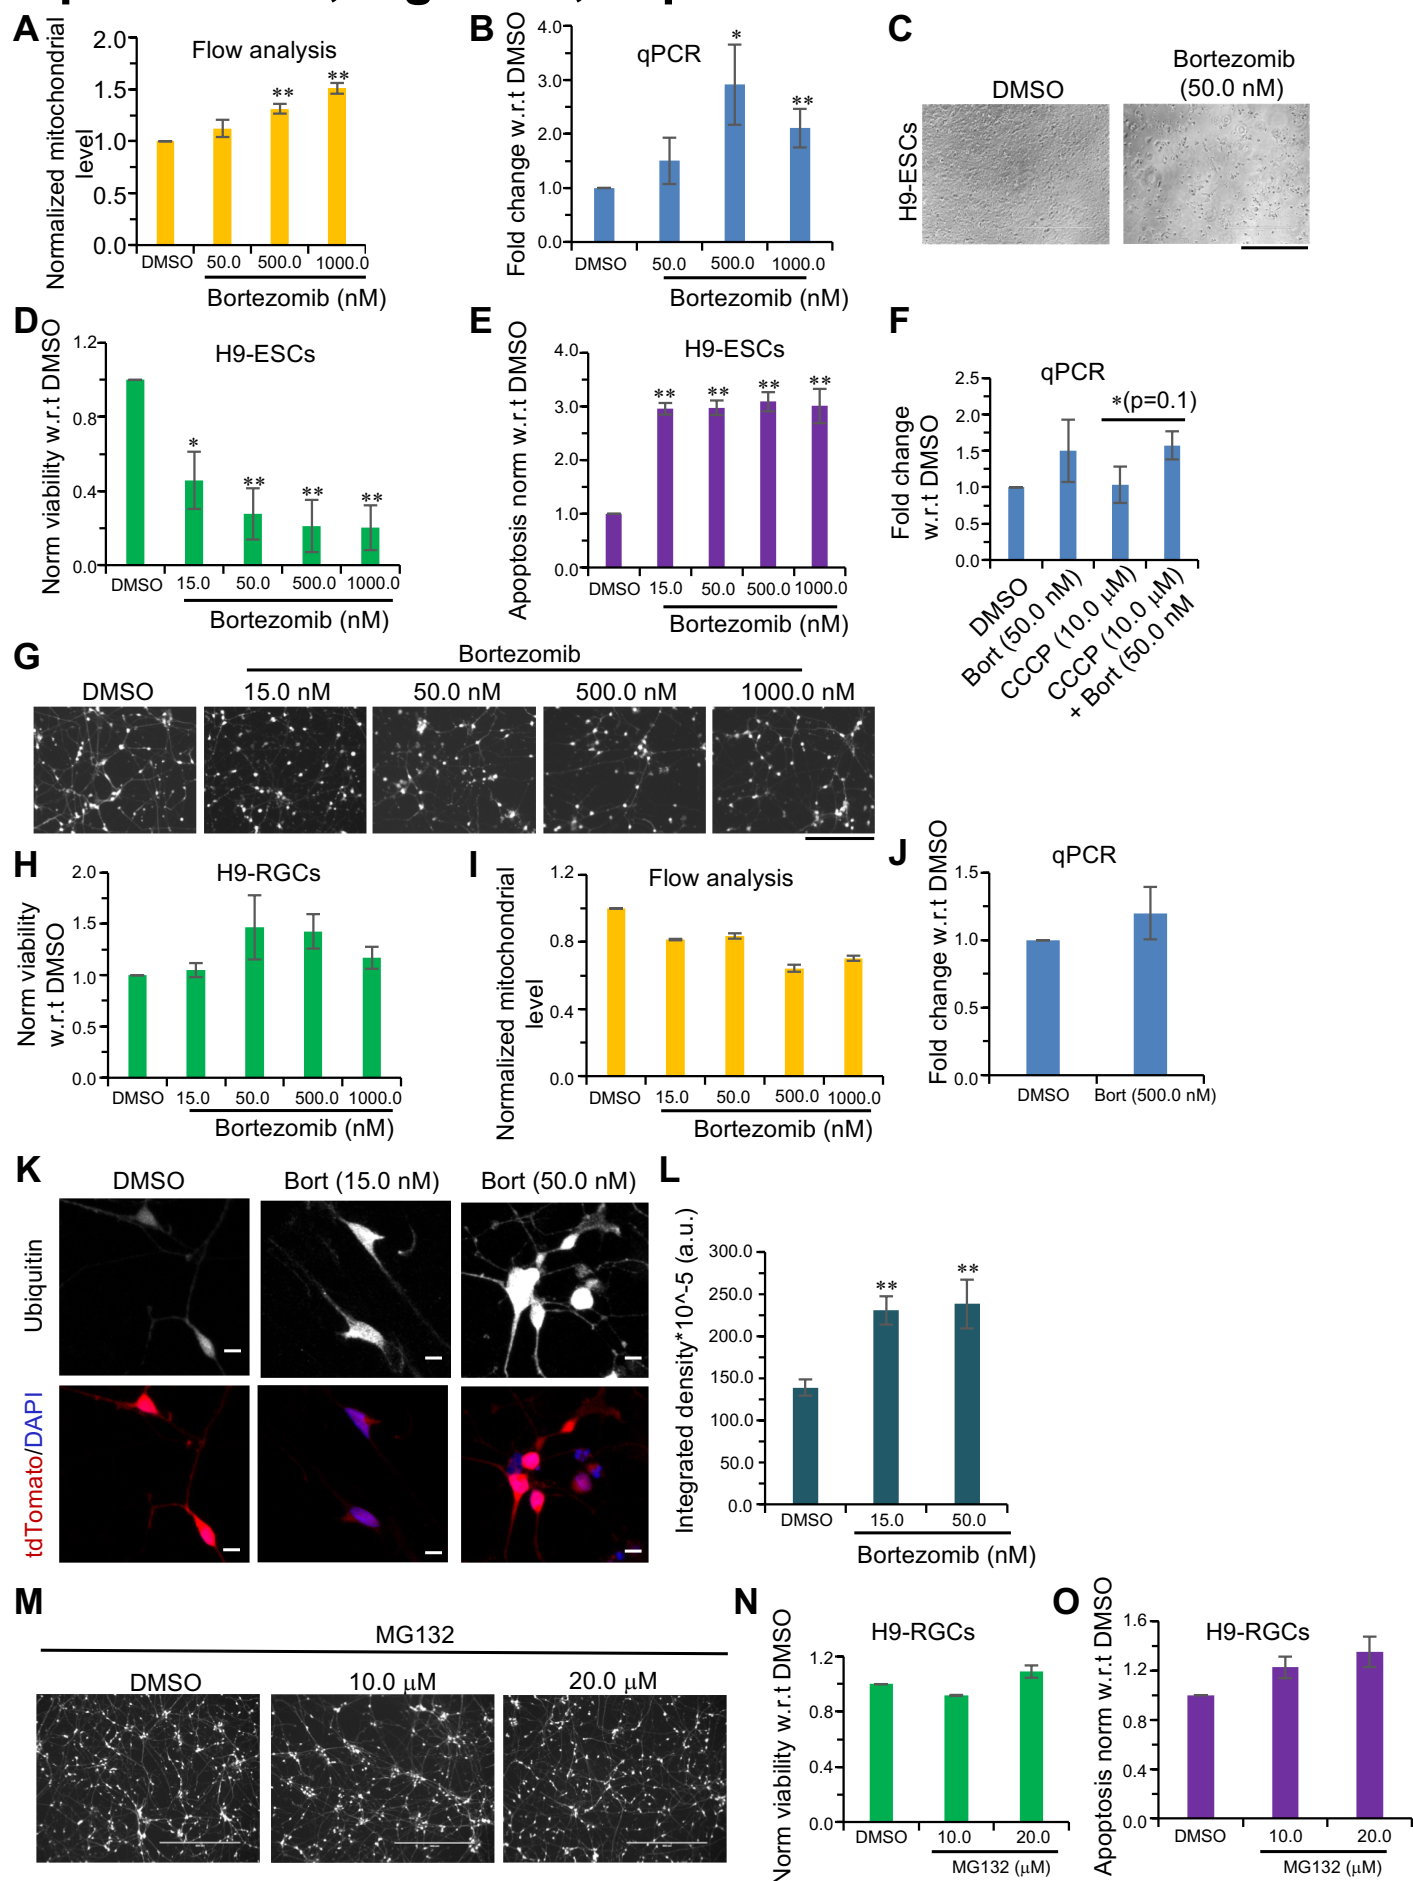

## Arupratan Das, Figure. 4, Top

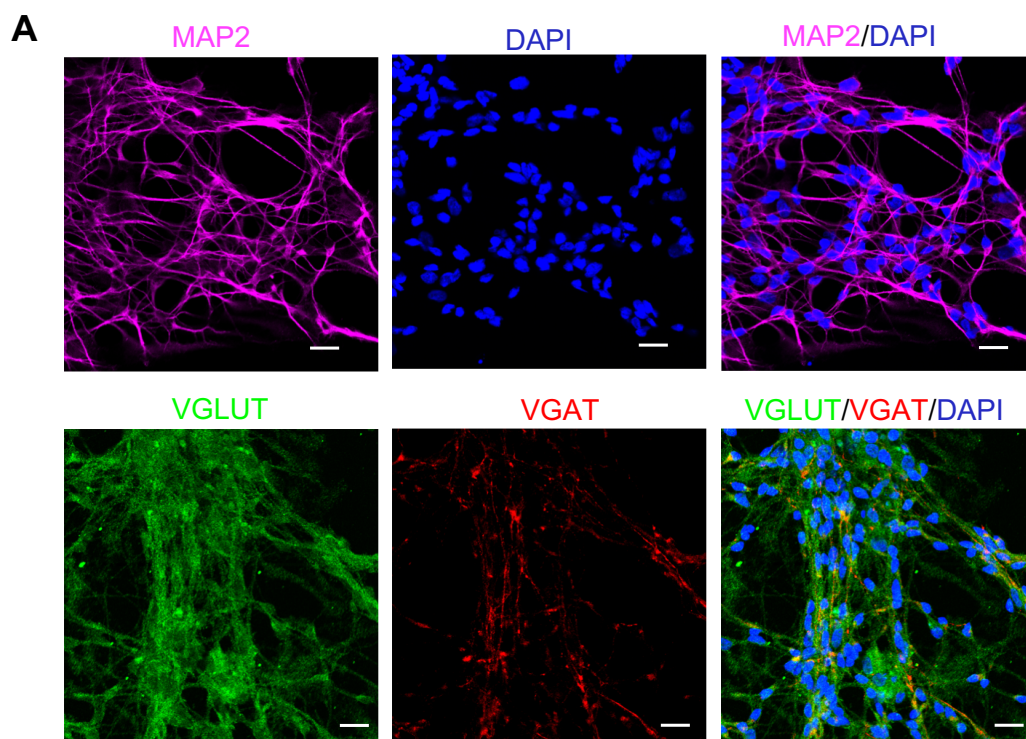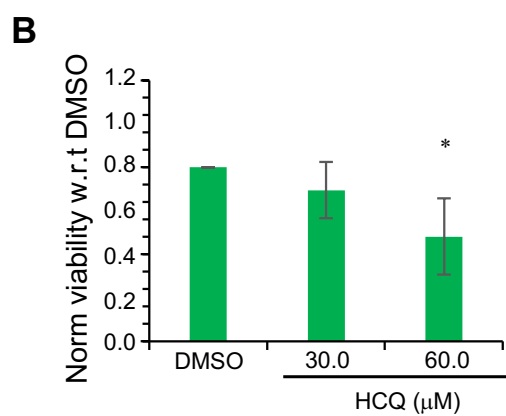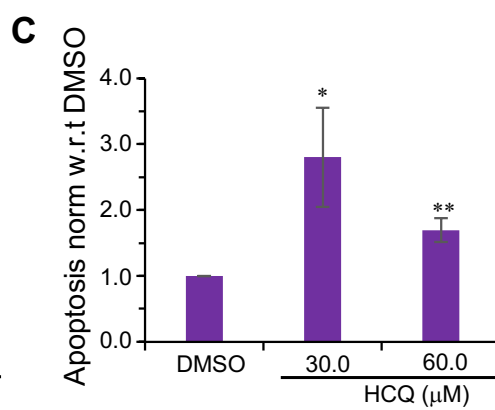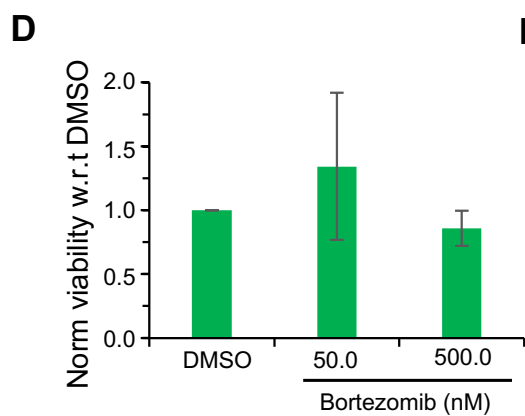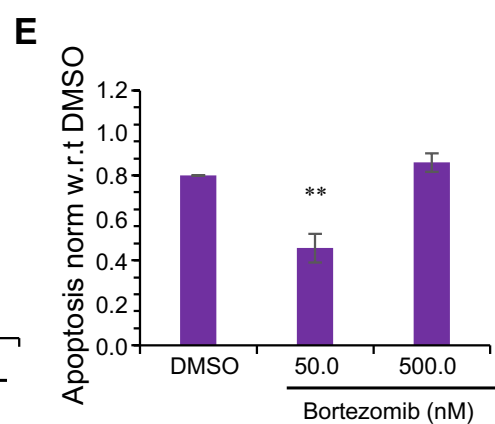

## Arupratan Das, Supplementary Figure S1, Top

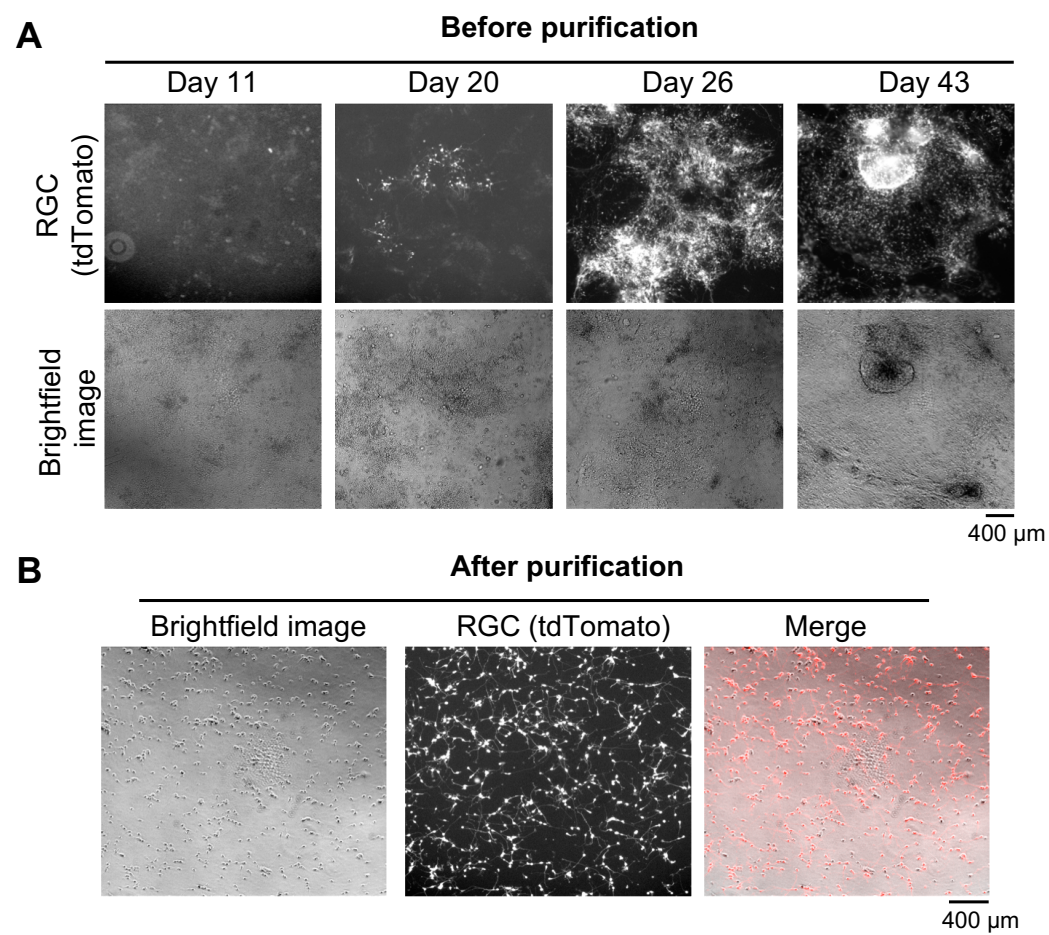

## Arupratan Das, Supplementary Figure S2, Top

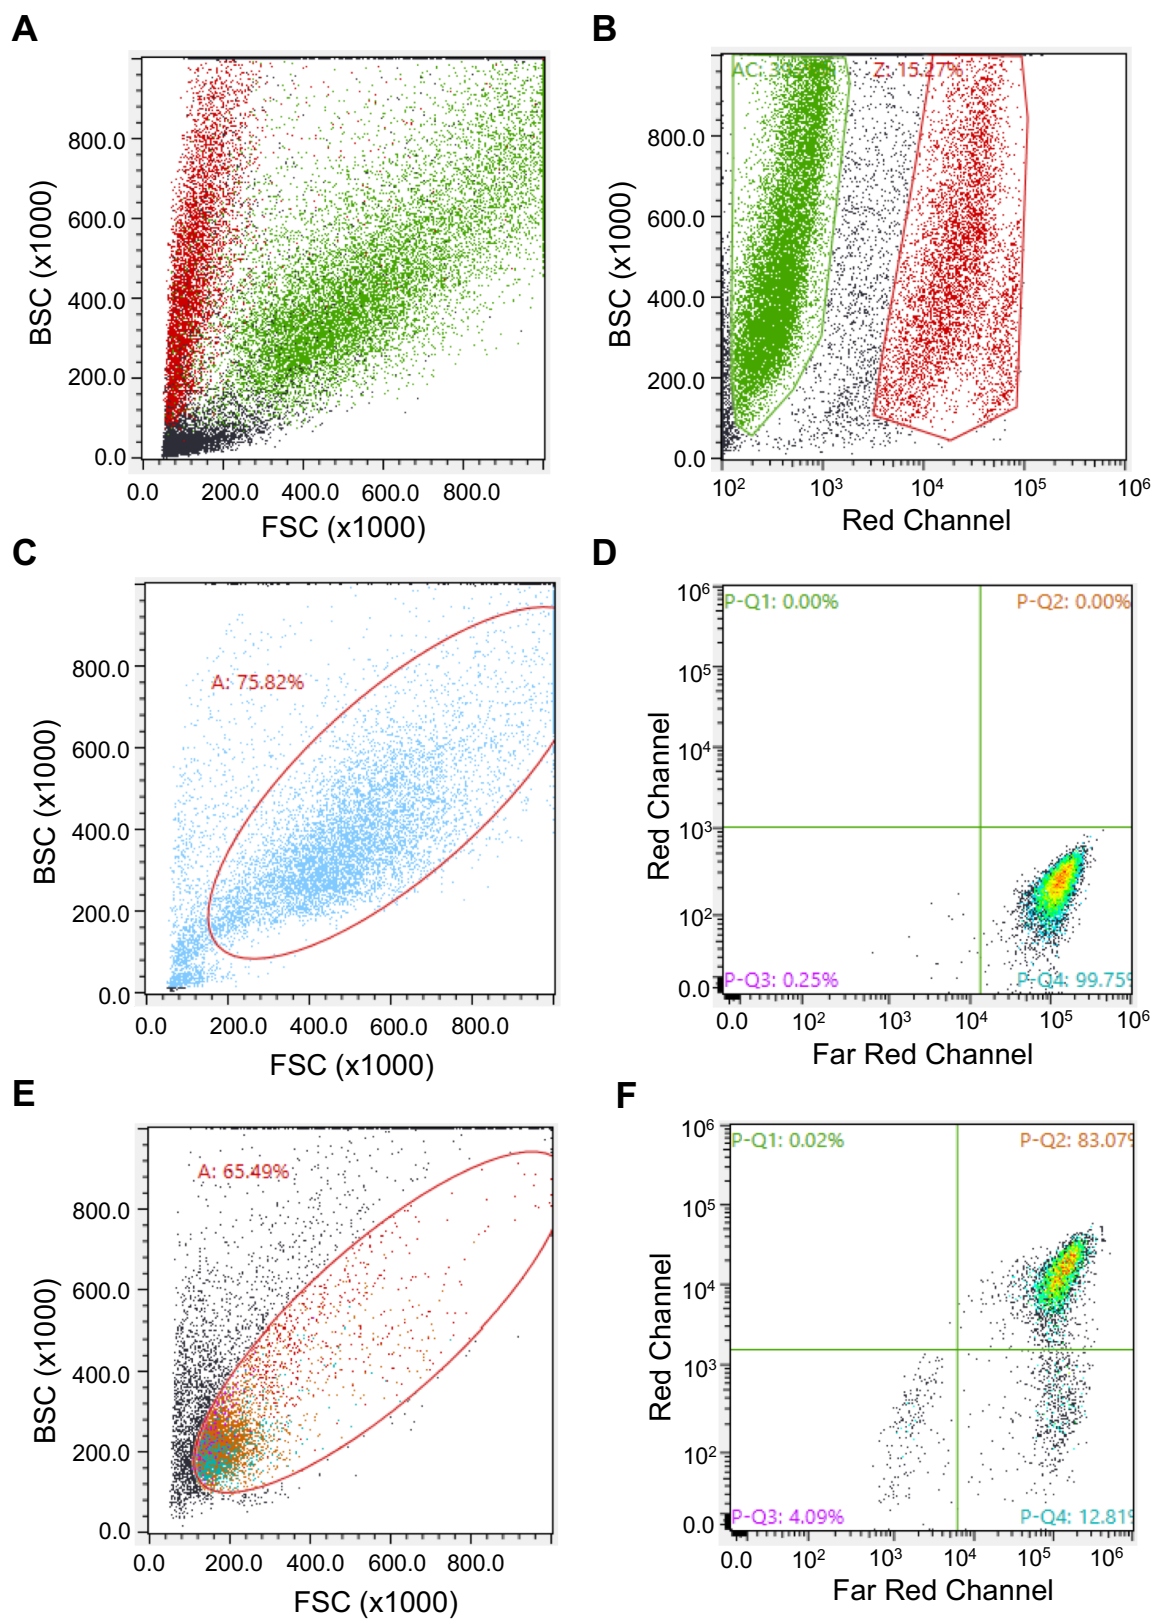

## Arupratan Das, Supplementary Figure S3, Top

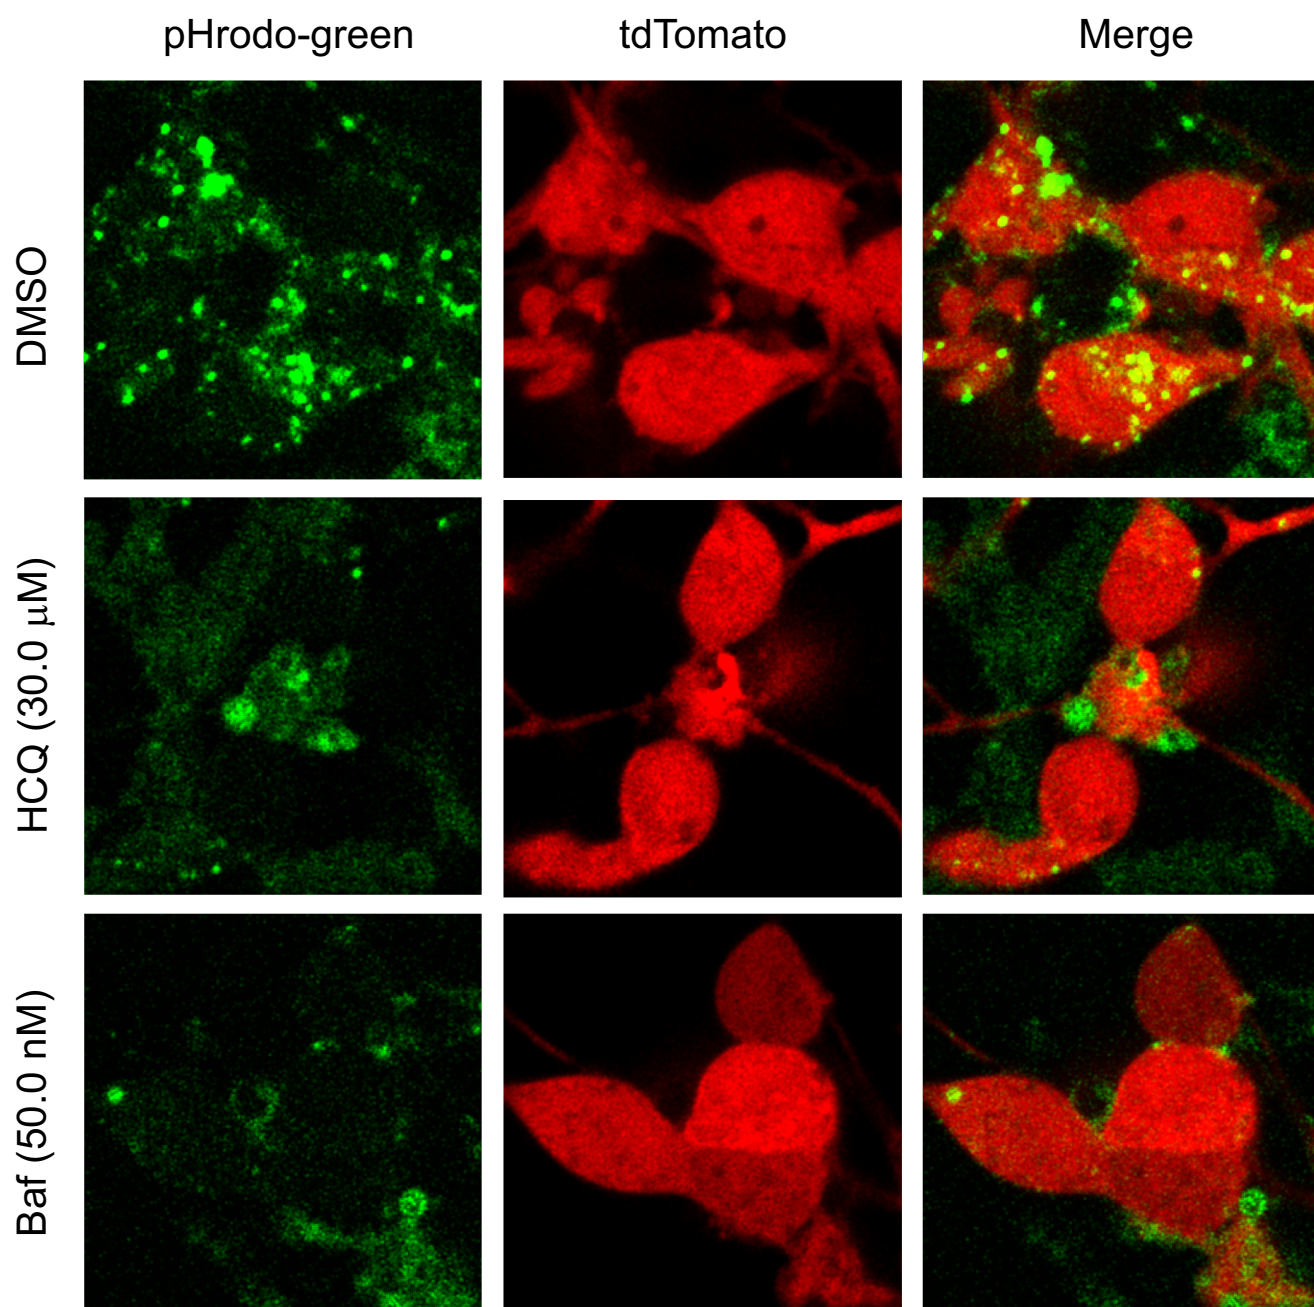

## Arupratan Das, Supplementary Figure S4, Top

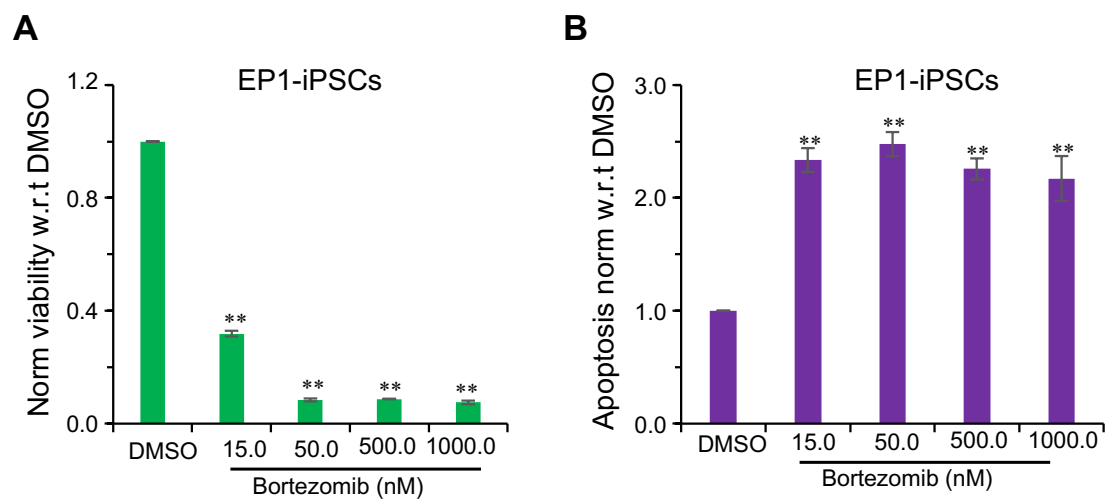

# Arupratan Das, Supplementary Figure S5, Top

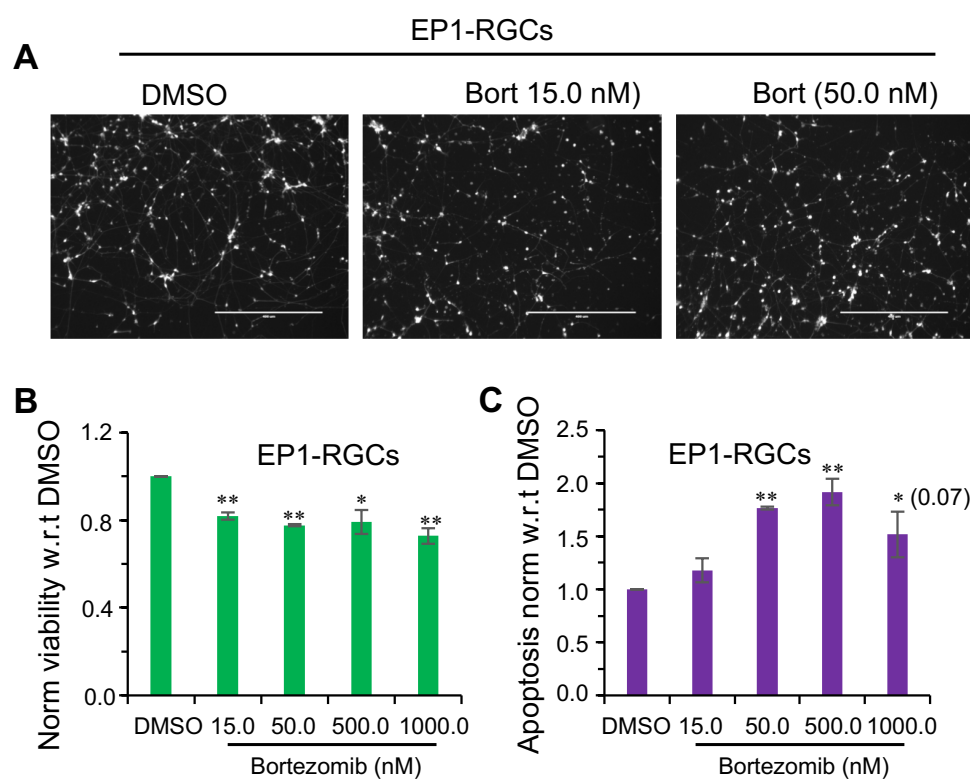

Source: http://biorxiv.org/content/10.1101/638585v1.full.pdf
